# Supplementary material
Source: publisher figshare collection journal article supplement (https://wiley.figshare.com/ndownloader/files/33556424)
Supplement: Supplementary file 1 [file 33556424]

## Sheet: Details
RAW DATA used in Richardson et al. 2018 Environmental Toxicology and Chemistry, doi:
Title: Assessment of sub-lethal effects of neonicotinoid insecticides on the life-history traits of two frog species
WFAbiotic worksheet
Treatment	Nominal treatment concentrations were 2.5 and 250 ug/L for thiamethoxam (THI_2.5, THI_250) and clothianidin (CLOTH_2.5, CLOTH_250)
Block	Replicate block that tadpole was exposed and developed
Temp	Temperature (°C)
DOM	Dissolved oxygen levels (mg/L)
pH	pH levels (0-14)
LFAbiotic worksheet
Treatment	Nominal treatment concentrations were 2.5 and 250 ug/L for thiamethoxam (THI_2.5, THI_250) and clothianidin (CLOTH_2.5, CLOTH_250)
Block	Replicate block that tadpole was exposed and developed
Temp	Temperature (°C)
DOM	Dissolved oxygen levels (mg/L)
pH	pH levels (0-14)
WFResponse worksheet
Frog_ID	Individual frog identification
Tank	Mesocosm that tadpole was exposed and developed
Block	Block that tadpole was exposed and developed
Treatment	Nominal treatment concentrations were 2.5 and 250 ug/L for thiamethoxam (THI-2.5, THI-250) and clothianidin (CLO-2.5, CLO-250)
Survival	Binary response if survived (1) or not (0)
Sex	Sex of frog if female (F) or male (M)
Sex2	Binary reponse of frog if female (0) or male (1)
Mass	Mass of frog (g)
Length	Snout-to-vent length at Gosner 46 (mm)
Days	The number of days to complete metamorphosis to Gosner 46
count_survival	The total number of surviving frogs and not from original sample size of 20 tadpoles per mesocosm
count_male	The total number per mesocosm of frogs identified as male (Total sexed minus Count_Female)
count_female	The total number per mesocosm of frogs identified as female (Total sexed minus Count_Male)
count_sexed	The total number of frogs sexed per mesocosm
LFResponse worksheet
FrogID	Individual frog identification
Tank	Mesocosm that tadpole was exposed and developed
Block	Block that tadpole was exposed and developed
Treatment	Nominal treatment concentrations were 2.5 and 250 ug/L for thiamethoxam (THI-2.5, THI-250) and clothianidin (CLO-2.5, CLO-250)
Survival	Binary response if survived (1) or not (0)
Sex	Sex of frog if female (F) or male (M)
Sex2	Binary reponse of frog if female (0) or male (1)
Mass	Mass of frog (g)
Length	Snout-to-vent length at Gosner 46 (mm)
Days	The number of days to complete metamorphosis to Gosner 46
Stage	Gosner stage of development of tadpoles that did not reach metamorphosis (Gosner 46) by the end of the experimental period
count_survival	The total number of surviving frogs and not from original sample size of 20 tadpoles per mesocosm
count_male	The total number per mesocosm of frogs identified as male (Total sexed minus Count_Female)
count_female	The total number per mesocosm of frogs identified as female (Total sexed minus Count_Male)
count_sexed	The total number of frogs sexed per mesocosm
WFRepeats
FrogID	Individual frog identification
Body length	Snout-to-vent length at Gosner 46 (mm)
LFRepeats
FrogID	Individual frog identification
Body length	Snout-to-vent length at Gosner 46 (mm)
Disclaimer: These datasets have been subjected to all reasonable efforts to ensure the accuracy of the data. The custodian of these datasets is Dr. Stacey Robinson; contact Dr. Robinson at Stacey.Robinson@canada.ca if you have any questions.

## Sheet: WFAbiotic
Date	Treatment	Block	DOM	Temp	pH
2015-05-13	Acontrol	1	7.69	17.1	7.6
2015-05-13	Acontrol	2	10.64	16.6	7.9
2015-05-13	Acontrol	3	9.34	16.5	7.8
2015-05-13	Acontrol	4	8.36	16.6	7.7
2015-05-13	Acontrol	5	9.61	16.8	7.9
2015-05-13	CLO-2.5	1	10.93	15.8	7.9
2015-05-13	CLO-2.5	2	8.93	16.9	7.7
2015-05-13	CLO-2.5	3	8.8	16.5	7.6
2015-05-13	CLO-2.5	4	10.3	16	8
2015-05-13	CLO-2.5	5	9.8	16.8	8.1
2015-05-13	CLO-250	1	7.72	16.9	7.8
2015-05-13	CLO-250	2	9.88	16.6	8
2015-05-13	CLO-250	3	10.93	15.8	8
2015-05-13	CLO-250	4	10.64	16.1	8
2015-05-13	CLO-250	5	8.76	16.8	7.8
2015-05-13	THI-2.5	1	10.08	17	8
2015-05-13	THI-2.5	2	10.05	16.2	8.1
2015-05-13	THI-2.5	3	10.13	16.1	8
2015-05-13	THI-2.5	4	8.58	16.5	7.9
2015-05-13	THI-2.5	5	9.92	16.7	8
2015-05-13	THI-250	1	10.31	16.3	8
2015-05-13	THI-250	2	8.25	16.6	7.8
2015-05-13	THI-250	3	10.13	16.1	8
2015-05-13	THI-250	4	8.53	16.7	7.8
2015-05-13	THI-250	5	8.53	16.8	7.7
2015-06-18	Acontrol	1	9.4	23.1	7.6
2015-06-18	Acontrol	2	8.8	23.1	7.5
2015-06-18	Acontrol	3	8.8	22.4	7.1
2015-06-18	Acontrol	4	8.9	22.6	7.5
2015-06-18	Acontrol	5	8.7	24.2	7.7
2015-06-18	CLO-2.5	1	8.9	22.7	7.5
2015-06-18	CLO-2.5	2	9.5	23.4	7.7
2015-06-18	CLO-2.5	3	8.6	22.8	7.7
2015-06-18	CLO-2.5	4	8.8	23	7.8
2015-06-18	CLO-2.5	5	8.8	23.8	7.8
2015-06-18	CLO-250	1	8.4	22.7	7.8
2015-06-18	CLO-250	2	8.8	22.2	7.8
2015-06-18	CLO-250	3	8.7	23.6	7.7
2015-06-18	CLO-250	4	8.6	22.5	7.8
2015-06-18	CLO-250	5	8.8	23.3	7.7
2015-06-18	THI-2.5	1	8.9	23.4	7.8
2015-06-18	THI-2.5	2	9.1	22.9	7.7
2015-06-18	THI-2.5	3	8.9	23	7.8
2015-06-18	THI-2.5	4	8.4	23.9	7.7
2015-06-18	THI-2.5	5	8.6	24.3	7.5
2015-06-18	THI-250	1	9.1	22	7.9
2015-06-18	THI-250	2	9	21.9	8
2015-06-18	THI-250	3	9	21.7	8
2015-06-18	THI-250	4	8.8	21.9	8
2015-06-18	THI-250	5	8.7	22.8	7.5
2015-06-24	Acontrol	1	9.2	26.9	7.7
2015-06-24	Acontrol	2	9	26.4	7.5
2015-06-24	Acontrol	3	8.8	25.1	7.9
2015-06-24	Acontrol	4	9.2	25.6	7.8
2015-06-24	Acontrol	5	9	25.9	7.5
2015-06-24	CLO-2.5	1	8.8	24.4	8.3
2015-06-24	CLO-2.5	2	9.2	24.7	8.2
2015-06-24	CLO-2.5	3	8.9	24.2	8.2
2015-06-24	CLO-2.5	4	8.8	24.1	8.3
2015-06-24	CLO-2.5	5	8.8	24.4	8.4
2015-06-24	CLO-250	1	9.1	25.3	7.9
2015-06-24	CLO-250	2	9.4	25	8
2015-06-24	CLO-250	3	8.7	25.1	8
2015-06-24	CLO-250	4	8.5	25.2	8
2015-06-24	CLO-250	5	8.8	25.7	7.9
2015-06-24	THI-2.5	1	8.9	25.8	8
2015-06-24	THI-2.5	2	9	24.9	8.1
2015-06-24	THI-2.5	3	9.1	24.8	8.1
2015-06-24	THI-2.5	4	8.8	25.5	8.1
2015-06-24	THI-2.5	5	9.2	25.7	8
2015-06-24	THI-250	1	8.9	25.6	7.7
2015-06-24	THI-250	2	8.9	25.3	7.6
2015-06-24	THI-250	3	8.6	25.4	7.4
2015-06-24	THI-250	4	8.4	25.5	7.7
2015-06-24	THI-250	5	8.9	25.1	7.7
2015-06-30	Acontrol	1	9.3	22.5	7.1
2015-06-30	Acontrol	2	9.7	22	7.2
2015-06-30	Acontrol	3	9.6	21.3	7
2015-06-30	Acontrol	4	9.4	22	7
2015-06-30	Acontrol	5	9.4	22.1	7.1
2015-06-30	CLO-2.5	1	9.4	21.4	8.1
2015-06-30	CLO-2.5	2	9.4	21.7	7.2
2015-06-30	CLO-2.5	3	9.6	21.1	8
2015-06-30	CLO-2.5	4	9.2	21.7	8.1
2015-06-30	CLO-2.5	5	9.1	21.5	8.1
2015-06-30	CLO-250	1	9.4	21.8	7.1
2015-06-30	CLO-250	2	9.7	21.6	7.1
2015-06-30	CLO-250	3	9.6	21.4	7
2015-06-30	CLO-250	4	9.3	21.4	7.1
2015-06-30	CLO-250	5	9.5	21.8	7.2
2015-06-30	THI-2.5	1	9.4	21.6	7.2
2015-06-30	THI-2.5	2	9.5	21.4	7.1
2015-06-30	THI-2.5	3	9.6	21.3	7.2
2015-06-30	THI-2.5	4	9.4	21.7	7.2
2015-06-30	THI-2.5	5	9.4	22.2	7.1
2015-06-30	THI-250	1	9.3	22	7.1
2015-06-30	THI-250	2	9.4	28.1	7.1
2015-06-30	THI-250	3	9.4	21.5	7
2015-06-30	THI-250	4	9.4	21.7	7
2015-06-30	THI-250	5	9.4	21.9	7

## Sheet: LFAbiotic
Date	Treatment	Block	DOM	Temp	pH
2015-05-21	Acontrol	1	8.74	12.5	8.1
2015-05-21	Acontrol	2	8.23	12.8	8.1
2015-05-21	Acontrol	3	8.4	12.5	8.3
2015-05-21	Acontrol	4	9.25	13.2	8.4
2015-05-21	Acontrol	5	8.99	12.7	8.1
2015-05-21	CLO_2.5	1	8.35	12.9	8.1
2015-05-21	CLO_2.5	2	10.08	11.7	8.4
2015-05-21	CLO_2.5	3	9.03	13	8.3
2015-05-21	CLO_2.5	4	9.68	12.7	8.1
2015-05-21	CLO_2.5	5	9.09	12.6	7.9
2015-05-21	CLO_250	1	9.56	12.1	8.3
2015-05-21	CLO_250	2	9.72	12.7	8
2015-05-21	CLO_250	3	8.97	12.6	8.2
2015-05-21	CLO_250	4	9.29	12.9	7.9
2015-05-21	CLO_250	5	9.1	12.4	8.3
2015-05-21	THI_2.5	1	7.35	12.9	8
2015-05-21	THI_2.5	2	8.74	12.9	7.9
2015-05-21	THI_2.5	3	9	12.8	7.9
2015-05-21	THI_2.5	4	8.45	13	7.9
2015-05-21	THI_2.5	5	8.87	12.7	8.1
2015-05-21	THI_250	1	8.92	12.8	8
2015-05-21	THI_250	2	9.07	12.5	8.2
2015-05-21	THI_250	3	8.45	12.7	7.9
2015-05-21	THI_250	4	9.96	12.8	7.9
2015-05-21	THI_250	5	9.82	12.6	8.3
2015-06-18	Acontrol	1	7.4	24.4	7.7
2015-06-18	Acontrol	2	8.1	24	7.7
2015-06-18	Acontrol	3	7.1	24.1	7.7
2015-06-18	Acontrol	4	8	23.9	7.6
2015-06-18	Acontrol	5	8.2	24.5	7.7
2015-06-18	CLO_2.5	1	8.3	24	7.7
2015-06-18	CLO_2.5	2	8.4	24.4	7.8
2015-06-18	CLO_2.5	3	8.3	23.7	7.8
2015-06-18	CLO_2.5	4	8.7	24.2	7.8
2015-06-18	CLO_2.5	5	8.3	24.8	7.8
2015-06-18	CLO_250	1	7.6	24.7	7.7
2015-06-18	CLO_250	2	8.2	24.6	7.7
2015-06-18	CLO_250	3	8.2	24.4	7.8
2015-06-18	CLO_250	4	8.4	23.7	7.8
2015-06-18	CLO_250	5	7.5	23.8	7.7
2015-06-18	THI_2.5	1	8.1	24.5	7.8
2015-06-18	THI_2.5	2	7.7	24.2	7.8
2015-06-18	THI_2.5	3	6.9	24.2	7.8
2015-06-18	THI_2.5	4	7.8	23.4	7.8
2015-06-18	THI_2.5	5	7.8	23.8	7.8
2015-06-18	THI_250	1	5.3	24.6	7.8
2015-06-18	THI_250	2	8.2	23.8	7.8
2015-06-18	THI_250	3	7.1	24.2	7.8
2015-06-18	THI_250	4	8.1	23.8	7.9
2015-06-18	THI_250	5	8.5	23.2	7.8
2015-06-24	Acontrol	1	8.1	25	7.9
2015-06-24	Acontrol	2	8.3	24.6	8.1
2015-06-24	Acontrol	3	8	24.1	8
2015-06-24	Acontrol	4	8.5	23.7	7.8
2015-06-24	Acontrol	5	9	24.6	8
2015-06-24	CLO_2.5	1	8.7	23.8	8.2
2015-06-24	CLO_2.5	2	8.7	23.4	8.1
2015-06-24	CLO_2.5	3	8.8	22.8	8.2
2015-06-24	CLO_2.5	4	9	22.7	8.2
2015-06-24	CLO_2.5	5	8.6	24.2	8.2
2015-06-24	CLO_250	1	8,1	25.2	8.1
2015-06-24	CLO_250	2	8.5	24.8	8
2015-06-24	CLO_250	3	8.4	23.9	7.9
2015-06-24	CLO_250	4	8.6	23.9	8.1
2015-06-24	CLO_250	5	8.3	24.4	8.1
2015-06-24	THI_2.5	1	8.3	25.3	8.1
2015-06-24	THI_2.5	2	8.4	23.8	8
2015-06-24	THI_2.5	3	8.1	24	8.2
2015-06-24	THI_2.5	4	8.5	23.7	8.2
2015-06-24	THI_2.5	5	8.5	24.3	8.1
2015-06-24	THI_250	1	8.3	25.7	7.5
2015-06-24	THI_250	2	8.5	24.6	8
2015-06-24	THI_250	3	7.8	24.3	8
2015-06-24	THI_250	4	8.3	24.7	8
2015-06-24	THI_250	5	8.5	24.2	7.9
2015-06-30	Acontrol	1	8.9	21.5	7.6
2015-06-30	Acontrol	2	9.1	21.2	7.1
2015-06-30	Acontrol	3	8.8	20.9	7.7
2015-06-30	Acontrol	4	9.3	20.7	7.6
2015-06-30	Acontrol	5	9	21.4	7.2
2015-06-30	CLO_2.5	1	9.3	21.1	8.2
2015-06-30	CLO_2.5	2	9.4	20.5	8.2
2015-06-30	CLO_2.5	3	9.5	20	8.2
2015-06-30	CLO_2.5	4	9.4	20.1	8.2
2015-06-30	CLO_2.5	5	9.3	20.9	8.1
2015-06-30	CLO_250	1	9	21.7	7.2
2015-06-30	CLO_250	2	9.3	21.4	7.3
2015-06-30	CLO_250	3	9.1	20.6	7.1
2015-06-30	CLO_250	4	9.4	20.5	7
2015-06-30	CLO_250	5	9	21.2	7.2
2015-06-30	THI_2.5	1	8.9	21.6	8
2015-06-30	THI_2.5	2	9.1	21	7.2
2015-06-30	THI_2.5	3	8.9	20.8	8.1
2015-06-30	THI_2.5	4	9.2	20.6	7.4
2015-06-30	THI_2.5	5	9.2	21.2	7.2
2015-06-30	THI_250	1	9.5	22.2	7.1
2015-06-30	THI_250	2	9.3	21.1	7
2015-06-30	THI_250	3	9.1	20.7	7
2015-06-30	THI_250	4	9.2	21.3	7
2015-06-30	THI_250	5	9.3	20.8	7
2015-07-08	Acontrol	1	8.8	23.3	8
2015-07-08	Acontrol	2	9.1	23.1	7.9
2015-07-08	Acontrol	3	7.8	23.2	8.1
2015-07-08	Acontrol	4	9.1	23.1	8.3
2015-07-08	Acontrol	5	9	23.5	8.3
2015-07-08	CLO_2.5	1	8.8	22.9	8.1
2015-07-08	CLO_2.5	2	9.2	22.4	7.8
2015-07-08	CLO_2.5	3	9.3	22.2	7.7
2015-07-08	CLO_2.5	4	9.2	22.1	8.2
2015-07-08	CLO_2.5	5	8.9	22.9	7.9
2015-07-08	CLO_250	1	8.9	23.8	8.1
2015-07-08	CLO_250	2	9.2	23.3	7.4
2015-07-08	CLO_250	3	8.7	22.8	7.7
2015-07-08	CLO_250	4	9.2	22.8	7.4
2015-07-08	CLO_250	5	8.6	23.3	7.3
2015-07-08	THI_2.5	1	8.7	23.9	8.2
2015-07-08	THI_2.5	2	9.1	23	8
2015-07-08	THI_2.5	3	8,6	23.2	8.2
2015-07-08	THI_2.5	4	8.9	23.1	8.1
2015-07-08	THI_2.5	5	9	23	8
2015-07-08	THI_250	1	9.1	24	8.3
2015-07-08	THI_250	2	9.1	23.6	8.4
2015-07-08	THI_250	3	8.7	23.8	8.3
2015-07-08	THI_250	4	9.2	23.9	8.4
2015-07-08	THI_250	5	9.2	23.6	8.5
2015-07-15	Acontrol	1	6.42	20.8	7.8
2015-07-15	Acontrol	2	7.47	20.5	7.9
2015-07-15	Acontrol	3	5.32	21	7.5
2015-07-15	Acontrol	4	8.06	21.2	7.9
2015-07-15	Acontrol	5	6.33	21.4	7.9
2015-07-15	CLO_2.5	1	7.83	20.5	7.9
2015-07-15	CLO_2.5	2	7.42	20	7.7
2015-07-15	CLO_2.5	3	7.72	19.9	7.8
2015-07-15	CLO_2.5	4	6.99	19.7	7.8
2015-07-15	CLO_2.5	5	7.11	20.8	7.9
2015-07-15	CLO_250	1	6.66	21.1	7.9
2015-07-15	CLO_250	2	8.11	20.9	8
2015-07-15	CLO_250	3	6.32	20.2	7.6
2015-07-15	CLO_250	4	6.92	21	7.7
2015-07-15	CLO_250	5	6.68	21.4	7.8
2015-07-15	THI_2.5	1	5.84	20.4	7.7
2015-07-15	THI_2.5	2	6.85	20.7	7.8
2015-07-15	THI_2.5	3	6.54	20.5	7.7
2015-07-15	THI_2.5	4	6.72	20.8	7.8
2015-07-15	THI_2.5	5	7.1	20.9	7.8
2015-07-15	THI_250	1	8.04	21.2	8.1
2015-07-15	THI_250	2	7.51	21.2	8
2015-07-15	THI_250	3	6.42	21.6	7.9
2015-07-15	THI_250	4	6.44	21.9	7.9
2015-07-15	THI_250	5	7.65	20	7.9
2015-07-22	Acontrol	1	5.82	24.3	7.8
2015-07-22	Acontrol	2	5.93	24	7.9
2015-07-22	Acontrol	3	5.76	23.6	7.6
2015-07-22	Acontrol	4	7.35	23.9	7.8
2015-07-22	Acontrol	5	5.97	24	7.9
2015-07-22	CLO_2.5	1	6.6	24.1	8
2015-07-22	CLO_2.5	2	6.93	23.3	7.6
2015-07-22	CLO_2.5	3	6.61	23.1	7.8
2015-07-22	CLO_2.5	4	6.88	23	7.9
2015-07-22	CLO_2.5	5	6.48	23.7	7.9
2015-07-22	CLO_250	1	5.94	24.3	7.8
2015-07-22	CLO_250	2	6.68	24.1	7.8
2015-07-22	CLO_250	3	5.66	23.4	7.7
2015-07-22	CLO_250	4	5.99	23.7	8
2015-07-22	CLO_250	5	6.11	24.1	7.8
2015-07-22	THI_2.5	1	5.13	24.4	7.6
2015-07-22	THI_2.5	2	6.55	24	7.7
2015-07-22	THI_2.5	3	7.67	23.8	7.6
2015-07-22	THI_2.5	4	6.22	23.9	7.7
2015-07-22	THI_2.5	5	5.36	23.9	7.8
2015-07-22	THI_250	1	6.09	24.6	8.1
2015-07-22	THI_250	2	6.44	23.9	8
2015-07-22	THI_250	3	5.59	24.1	8
2015-07-22	THI_250	4	5.97	24.2	8
2015-07-22	THI_250	5	6.94	23.4	7.8

## Sheet: WFResponse
Frog_ID	Tank	Block	Treatment	Survival	Sex	Sex2	Mass	Length	Days	count_survival	count_male	count_female	count_sexed
G01-M01	G01	1	Acontrol	1	M	1	1	24.385	42	12	8	4	12
G01-M02	G01	1	Acontrol	1	M	1	1.1	24.967	42	12	8	4	12
G01-M03	G01	1	Acontrol	1	F	0	0.9	19.741	42	12	8	4	12
G01-M04	G01	1	Acontrol	1	M	1	0.8	22.208	42	12	8	4	12
G01-M05	G01	1	Acontrol	1	M	1	1	23.184	45	12	8	4	12
G01-M06	G01	1	Acontrol	1	M	1	0.8	21.2	42	12	8	4	12
G01-M07	G01	1	Acontrol	1	F	0	0.9	22.869	44	12	8	4	12
G01-M08	G01	1	Acontrol	1	F	0	0.7	22.482	45	12	8	4	12
G01-M09	G01	1	Acontrol	1	M	1	0.9	23.719	44	12	8	4	12
G01-M10	G01	1	Acontrol	1	M	1	1.2	24.974	47	12	8	4	12
G01-M11	G01	1	Acontrol	1	F	0	1	24.621	47	12	8	4	12
G01-M12	G01	1	Acontrol	1	M	1	1.4	23.649	49	12	8	4	12
G01-M13	G01	1	Acontrol	0						8	8	4
G01-M14	G01	1	Acontrol	0						8	8	4
G01-M15	G01	1	Acontrol	0						8	8	4
G01-M16	G01	1	Acontrol	0						8	8	4
G01-M17	G01	1	Acontrol	0						8	8	4
G01-M18	G01	1	Acontrol	0						8	8	4
G01-M19	G01	1	Acontrol	0						8	8	4
G01-M20	G01	1	Acontrol	0						8	8	4
G02-M01	G02	5	Acontrol	1	M	1	1	24.592	44	13	9	4	13
G02-M02	G02	5	Acontrol	1	F	0	0.8	23.006	43	13	9	4	13
G02-M03	G02	5	Acontrol	1	M	1	0.9	23.006	44	13	9	4	13
G02-M04	G02	5	Acontrol	1	F	0	0.8	21.722	46	13	9	4	13
G02-M05	G02	5	Acontrol	1	M	1	0.9	21.702	47	13	9	4	13
G02-M06	G02	5	Acontrol	1	M	1	0.8	24.351	47	13	9	4	13
G02-M07	G02	5	Acontrol	1	M	1	1	22.754	49	13	9	4	13
G02-M08	G02	5	Acontrol	1	M	1	1.1	23.608	49	13	9	4	13
G02-M09	G02	5	Acontrol	1	M	1	1.2	23.919	49	13	9	4	13
G02-M10	G02	5	Acontrol	1	F	0	0.9	23.962	49	13	9	4	13
G02-M11	G02	5	Acontrol	1	F	0	0.9	22.766	47	13	9	4	13
G02-M12	G02	5	Acontrol	1	M	1	1	22.881	50	13	9	4	13
G02-M13	G02	5	Acontrol	1	M	1	0.9	22.416	53	13	9	4	13
G02-M14	G02	5	Acontrol	0						7	9	4
G02-M15	G02	5	Acontrol	0						7	9	4
G02-M16	G02	5	Acontrol	0						7	9	4
G02-M17	G02	5	Acontrol	0						7	9	4
G02-M18	G02	5	Acontrol	0						7	9	4
G02-M19	G02	5	Acontrol	0						7	9	4
G02-M20	G02	5	Acontrol	0						7	9	4
G03-M02	G03	2	Acontrol	1	M	1	0.8	23.129	44	16	12	4	16
G03-M03	G03	2	Acontrol	1	M	1	0.7		45	16	12	4	16
G03-M04	G03	2	Acontrol	1	F	0	0.7	21.649	46	16	12	4	16
G03-M05	G03	2	Acontrol	1	M	1	0.7	21.731	45	16	12	4	16
G03-M06	G03	2	Acontrol	1	M	1	0.9	21.907	45	16	12	4	16
G03-M07	G03	2	Acontrol	1	M	1	0.8	22.029	45	16	12	4	16
G03-M08	G03	2	Acontrol	1	M	1	0.9	21.867	46	16	12	4	16
G03-M09	G03	2	Acontrol	1	M	1	0.7	21.25	47	16	12	4	16
G03-M10	G03	2	Acontrol	1	M	1	0.7	20.757	49	16	12	4	16
G03-M11	G03	2	Acontrol	1	F	0	0.7	20.486	49	16	12	4	16
G03-M12	G03	2	Acontrol	1	M	1	0.8	22.671	49	16	12	4	16
G03-M13	G03	2	Acontrol	1	F	0	0.8	23.743	49	16	12	4	16
G03-M14	G03	2	Acontrol	1	M	1	0.8	22.713	49	16	12	4	16
G03-M15	G03	2	Acontrol	1	M	1	0.7	21.517	52	16	12	4	16
G03-M16	G03	2	Acontrol	1	M	1	0.7	21.738	52	16	12	4	16
G03-M17	G03	2	Acontrol	1	F	0	0.9	21.885	52	16	12	4	16
G03-M18	G03	2	Acontrol	0						4	12	4
G03-M19	G03	2	Acontrol	0						4	12	4
G03-M20	G03	2	Acontrol	0						4	12	4
G03-M01	G03	2	Acontrol	0	M	1				4	12	4
G04-M01	G04	4	Acontrol	1	F	0	0.8	24.31	42	12	8	4	12
G04-M02	G04	4	Acontrol	1	M	1	0.7	21.894	44	12	8	4	12
G04-M03	G04	4	Acontrol	1	M	1	0.8	23.398	44	12	8	4	12
G04-M04	G04	4	Acontrol	1	F	0	0.7	22.229	45	12	8	4	12
G04-M05	G04	4	Acontrol	1	M	1	0.8	22.707	45	12	8	4	12
G04-M06	G04	4	Acontrol	1	M	1	0.7	20.977	45	12	8	4	12
G04-M07	G04	4	Acontrol	1	M	1	1	23.454	46	12	8	4	12
G04-M08	G04	4	Acontrol	1	F	0	0.7	23.323	46	12	8	4	12
G04-M09	G04	4	Acontrol	1	M	1	0.7	21.58	49	12	8	4	12
G04-M10	G04	4	Acontrol	1	F	0	0.6	22.159	50	12	8	4	12
G04-M11	G04	4	Acontrol	1	M	1	0.8	22.022	50	12	8	4	12
G04-M12	G04	4	Acontrol	1	M	1	0.8	21.093	52	12	8	4	12
G04-M13	G04	4	Acontrol	0						8	8	4
G04-M14	G04	4	Acontrol	0						8	8	4
G04-M15	G04	4	Acontrol	0						8	8	4
G04-M16	G04	4	Acontrol	0						8	8	4
G04-M17	G04	4	Acontrol	0						8	8	4
G04-M18	G04	4	Acontrol	0						8	8	4
G04-M19	G04	4	Acontrol	0						8	8	4
G04-M20	G04	4	Acontrol	0						8	8	4
G05-M01	G05	3	Acontrol	1	M	1	0.5	17.583	45	14	9	5	14
G05-M02	G05	3	Acontrol	1	M	1	0.7	21.62	45	14	9	5	14
G05-M03	G05	3	Acontrol	1	F	0	0.7	21.712	46	14	9	5	14
G05-M04	G05	3	Acontrol	1	M	1	0.8	22.315	46	14	9	5	14
G05-M05	G05	3	Acontrol	1	M	1	0.7	21.257	45	14	9	5	14
G05-M06	G05	3	Acontrol	1	F	0	0.7	21.431	45	14	9	5	14
G05-M07	G05	3	Acontrol	1	M	1	0.8	22.605	45	14	9	5	14
G05-M08	G05	3	Acontrol	1	F	0	0.6	20.841	45	14	9	5	14
G05-M09	G05	3	Acontrol	1	M	1	0.8	21.683	45	14	9	5	14
G05-M10	G05	3	Acontrol	1	F	0	0.7	21.339	47	14	9	5	14
G05-m11	G05	3	Acontrol	1	M	1	1.1	22.842	50	14	9	5	14
G05-M12	G05	3	Acontrol	1	M	1	0.8	21.626	50	14	9	5	14
G05-M13	G05	3	Acontrol	1	F	0	0.7	19.894	56	14	9	5	14
G05-M14	G05	3	Acontrol	1	M	1	0.6	21.335	58	14	9	5	14
G05-M15	G05	3	Acontrol	0						6	9	5
G05-M16	G05	3	Acontrol	0						6	9	5
G05-M17	G05	3	Acontrol	0						6	9	5
G05-M18	G05	3	Acontrol	0						6	9	5
G05-M19	G05	3	Acontrol	0						6	9	5
G05-M20	G05	3	Acontrol	0						6	9	5
P01-M01	P01	4	CLO-2.5	1	F	0	0.7	21.291	45	14	8	6	14
P01-M02	P01	4	CLO-2.5	1	F	0	0.7	21.708	45	14	8	6	14
P01-M03	P01	4	CLO-2.5	1	F	0	0.8	21.533	45	14	8	6	14
P01-M04	P01	4	CLO-2.5	1	F	0	0.9	23.056	45	14	8	6	14
P01-M05	P01	4	CLO-2.5	1	M	1	0.6	22.363	46	14	8	6	14
P01-M06	P01	4	CLO-2.5	1	M	1	0.8	22.526	46	14	8	6	14
P01-M07	P01	4	CLO-2.5	1	M	1	0.8	22.825	45	14	8	6	14
P01-M08	P01	4	CLO-2.5	1	M	1	0.8	21.69	46	14	8	6	14
P01-M09	P01	4	CLO-2.5	1	M	1	1	24.782	47	14	8	6	14
P01-M10	P01	4	CLO-2.5	1	M	1	0.9	21.016	46	14	8	6	14
P01-M11	P01	4	CLO-2.5	1	F	0	0.9	22.847	47	14	8	6	14
P01-M12	P01	4	CLO-2.5	1	M	1	0.9	23.136	49	14	8	6	14
P01-M13	P01	4	CLO-2.5	1	F	0	1	23.205	50	14	8	6	14
P01-M14	P01	4	CLO-2.5	1	M	1	1	22.575	52	14	8	6	14
P01-M15	P01	4	CLO-2.5	0						6	8	6
P01-M16	P01	4	CLO-2.5	0						6	8	6
P01-M17	P01	4	CLO-2.5	0						6	8	6
P01-M18	P01	4	CLO-2.5	0						6	8	6
P01-M19	P01	4	CLO-2.5	0						6	8	6
P01-M20	P01	4	CLO-2.5	0						6	8	6
P02-M01	P02	2	CLO-2.5	1	F	0	0.6	20.753	44	16	6	9	15
P02-M02	P02	2	CLO-2.5	1	F	0	0.6	20.097	42	16	6	9	15
P02-M03	P02	2	CLO-2.5	1	M	1	0.7	20.294	42	16	6	9	15
P02-M04	P02	2	CLO-2.5	1	F	0	0.5	18.781	42	16	6	9	15
P02-M05	P02	2	CLO-2.5	1	F	0	0.6	19.428	42	16	6	9	15
P02-M06	P02	2	CLO-2.5	1	F	0	0.7	21.889	44	16	6	9	15
P02-M07	P02	2	CLO-2.5	1			0.6	21.332	45	16	6	9	15
P02-M08	P02	2	CLO-2.5	1	F	0	0.8	21.153	45	16	6	9	15
P02-M09	P02	2	CLO-2.5	1	M	1	0.7	21.093	44	16	6	9	15
P02-M10	P02	2	CLO-2.5	1	F	0	0.6	19.996	46	16	6	9	15
P02-M11	P02	2	CLO-2.5	1	M	1	0.6	20.768	46	16	6	9	15
P02-M12	P02	2	CLO-2.5	1	F	0	0.7	21.414	46	16	6	9	15
P02-M13	P02	2	CLO-2.5	1	M	1	0.6	19.885	45	16	6	9	15
P02-M14	P02	2	CLO-2.5	1	M	1	0.6	21.513	46	16	6	9	15
P02-M15	P02	2	CLO-2.5	1	M	1	0.6	20.801	46	16	6	9	15
P02-M16	P02	2	CLO-2.5	1	F	0	0.8	21.135	46	16	6	9	15
P02-M17	P02	2	CLO-2.5	0						4	6	9
P02-M18	P02	2	CLO-2.5	0						4	6	9
P02-M19	P02	2	CLO-2.5	0						4	6	9
P02-M20	P02	2	CLO-2.5	0						4	6	9
P03-M01	P03	5	CLO-2.5	1	F	0	0.7	22.138	45	14	8	6	14
P03-M02	P03	5	CLO-2.5	1	F	0	0.8	22.449	43	14	8	6	14
P03-M03	P03	5	CLO-2.5	1	M	1	1	23.987	44	14	8	6	14
P03-M04	P03	5	CLO-2.5	1	F	0	0.7	21.872	45	14	8	6	14
P03-M05	P03	5	CLO-2.5	1	F	0	0.7	21.801	45	14	8	6	14
P03-M06	P03	5	CLO-2.5	1	M	1	0.8	21.271	46	14	8	6	14
P03-M07	P03	5	CLO-2.5	1	M	1	0.7	24.95	44	14	8	6	14
P03-M08	P03	5	CLO-2.5	1	M	1	0.9	22.67	44	14	8	6	14
P03-M09	P03	5	CLO-2.5	1	M	1	1	21.883	47	14	8	6	14
P03-M10	P03	5	CLO-2.5	1	M	1	0.8	22.419	47	14	8	6	14
P03-M11	P03	5	CLO-2.5	1	M	1	0.9	20.396	46	14	8	6	14
P03-M12	P03	5	CLO-2.5	1	F	0	0.9	22.471	49	14	8	6	14
P03-M13	P03	5	CLO-2.5	1	F	0	0.9	23.255	49	14	8	6	14
P03-M14	P03	5	CLO-2.5	1	M	1	1.1	22.87	53	14	8	6	14
P03-M15	P03	5	CLO-2.5	0						6	8	6
P03-M16	P03	5	CLO-2.5	0						6	8	6
P03-M17	P03	5	CLO-2.5	0						6	8	6
P03-M18	P03	5	CLO-2.5	0						6	8	6
P03-M19	P03	5	CLO-2.5	0						6	8	6
P03-M20	P03	5	CLO-2.5	0						6	8	6
P04-M01	P04	1	CLO-2.5	1	M	1	0.6	20.96	42	15	11	4	15
P04-M02	P04	1	CLO-2.5	1	M	1	0.5	18.781	45	15	11	4	15
P04-M03	P04	1	CLO-2.5	1	M	1	0.6	19.998	45	15	11	4	15
P04-M04	P04	1	CLO-2.5	1	M	1	0.8	21.82	45	15	11	4	15
P04-M05	P04	1	CLO-2.5	1	M	1	0.6	19.17	45	15	11	4	15
P04-M06	P04	1	CLO-2.5	1	M	1	0.7	21.009	46	15	11	4	15
P04-M07	P04	1	CLO-2.5	1	F	0	0.4	18.74	47	15	11	4	15
P04-M08	P04	1	CLO-2.5	1	F	0	0.8	23.307	49	15	11	4	15
P04-M09	P04	1	CLO-2.5	1	M	1	0.6	20.042	49	15	11	4	15
P04-M10	P04	1	CLO-2.5	1	M	1	0.5	20.926	49	15	11	4	15
P04-M11	P04	1	CLO-2.5	1	M	1	0.6	19.941	50	15	11	4	15
P04-M12	P04	1	CLO-2.5	1	M	1	0.7	20.938	50	15	11	4	15
P04-M13	P04	1	CLO-2.5	1	M	1	0.7	20.151	52	15	11	4	15
P04-M14	P04	1	CLO-2.5	1	F	0	0.7	21.222	52	15	11	4	15
P04-M15	P04	1	CLO-2.5	1	F	0	0.6	21.59	52	15	11	4	15
P04-M16	P04	1	CLO-2.5	0						5	11	4
P04-M17	P04	1	CLO-2.5	0						5	11	4
P04-M18	P04	1	CLO-2.5	0						5	11	4
P04-M19	P04	1	CLO-2.5	0						5	11	4
P04-M20	P04	1	CLO-2.5	0						5	11	4
P05-M01	P05	3	CLO-2.5	1	M	1	0.6	20.757	46	16	10	6	16
P05-M02	P05	3	CLO-2.5	1	F	0	0.7	21.021	46	16	10	6	16
P05-M03	P05	3	CLO-2.5	1	M	1	0.5	21.688	45	16	10	6	16
P05-M04	P05	3	CLO-2.5	1	M	1	0.7	21.177	45	16	10	6	16
P05-M05	P05	3	CLO-2.5	1	M	1	0.6	19.986	46	16	10	6	16
P05-M06	P05	3	CLO-2.5	1	F	0	0.9	24.36	47	16	10	6	16
P05-M07	P05	3	CLO-2.5	1	M	1	0.6	20.608	49	16	10	6	16
P05-M08	P05	3	CLO-2.5	1	M	1	0.5	20.973	49	16	10	6	16
P05-M09	P05	3	CLO-2.5	1	F	0	0.6	20.297	49	16	10	6	16
P05-M10	P05	3	CLO-2.5	1	F	0	0.6	19.75	50	16	10	6	16
P05-M11	P05	3	CLO-2.5	1	F	0	0.8	21.716	50	16	10	6	16
P05-M12	P05	3	CLO-2.5	1	M	1	0.7	20.699	50	16	10	6	16
P05-M13	P05	3	CLO-2.5	1	M	1	0.8	21.79	50	16	10	6	16
P05-M14	P05	3	CLO-2.5	1	F	0	0.6	20.364	52	16	10	6	16
P05-M15	P05	3	CLO-2.5	1	M	1	0.7	21.045	56	16	10	6	16
P05-M16	P05	3	CLO-2.5	1	M	1	0.8	21.304	56	16	10	6	16
P05-M17	P05	3	CLO-2.5	0						4	10	6
P05-M18	P05	3	CLO-2.5	0						4	10	6
P05-M19	P05	3	CLO-2.5	0						4	10	6
P05-M20	P05	3	CLO-2.5	0						4	10	6
R01-M01	R01	3	CLO-250	1	M	1	0.7	21.537	46	14	12	2	14
R01-M02	R01	3	CLO-250	1	M	1	0.6	19.727	46	14	12	2	14
R01-M03	R01	3	CLO-250	1	F	0	0.7	21.802	46	14	12	2	14
R01-M04	R01	3	CLO-250	1	M	1	0.8	22.018	46	14	12	2	14
R01-M05	R01	3	CLO-250	1	M	1	0.8	19.355	44	14	12	2	14
R01-M06	R01	3	CLO-250	1	M	1	0.7	21.453	44	14	12	2	14
R01-M07	R01	3	CLO-250	1	M	1	0.8	23.242	45	14	12	2	14
R01-M08	R01	3	CLO-250	1	M	1		22.964	45	14	12	2	14
R01-M09	R01	3	CLO-250	0						6	12	2	14
R01-M10	R01	3	CLO-250	1	M	1	0.8	19.08	46	14	12	2	14
R01-M11	R01	3	CLO-250	1	M	1	0.9	21.722	47	14	12	2	14
R01-M12	R01	3	CLO-250	1	M	1	0.8	20.711	47	14	12	2	14
R01-M13	R01	3	CLO-250	1	M	1	0.8	22.352	52	14	12	2	14
R01-M14	R01	3	CLO-250	1	M	1	1	22.512	52	14	12	2	14
R01-M15	R01	3	CLO-250	1	F	0	0.7	20.936	53	14	12	2	14
R01-M16	R01	3	CLO-250	0						6	12	2
R01-M17	R01	3	CLO-250	0						6	12	2
R01-M18	R01	3	CLO-250	0						6	12	2
R01-M19	R01	3	CLO-250	0						6	12	2
R01-M20	R01	3	CLO-250	0						6	12	2
R02-M01	R02	5	CLO-250	1	F	0	0.9	22.07	46	10	5	3	8
R02-M02	R02	5	CLO-250	1	M	1	0.8	22.605	44	10	5	3	8
R02-M03a	R02	5	CLO-250	1					45	10	5	3	8
R02-M03b	R02	5	CLO-250	1			0.8	21.411	46	10	5	3	8
R02-M04	R02	5	CLO-250	1	F	0	1	22.638	47	10	5	3	8
R02-M05	R02	5	CLO-250	1	M	1	0.9	23.193	46	10	5	3	8
R02-M06	R02	5	CLO-250	1	M	1	0.8	22.988	47	10	5	3	8
R02-M07	R02	5	CLO-250	1	M	1	1.1	24.648	49	10	5	3	8
R02-M08	R02	5	CLO-250	1	M	1	0.9	23.401	52	10	5	3	8
R02-M09	R02	5	CLO-250	1	F	0	1	22.734	52	10	5	3	8
R02-M10	R02	5	CLO-250	0						10	5	3
R02-M11	R02	5	CLO-250	0						10	5	3
R02-M12	R02	5	CLO-250	0						10	5	3
R02-M13	R02	5	CLO-250	0						10	5	3
R02-M14	R02	5	CLO-250	0						10	5	3
R02-M15	R02	5	CLO-250	0						10	5	3
R02-M16	R02	5	CLO-250	0						10	5	3
R02-M17	R02	5	CLO-250	0						10	5	3
R02-M18	R02	5	CLO-250	0						10	5	3
R02-M19	R02	5	CLO-250	0						10	5	3
R03-M01	R03	1	CLO-250	1	F	0	0.6	20.393	45	13	8	5	13
R03-M02	R03	1	CLO-250	1	M	1	0.6	20.16	46	13	8	5	13
R03-M03	R03	1	CLO-250	1	M	1	0.8	24.172	45	13	8	5	13
R03-M04	R03	1	CLO-250	1	M	1	0.8	22.188	47	13	8	5	13
R03-M05	R03	1	CLO-250	1	M	1	0.9	22.903	46	13	8	5	13
R03-M06	R03	1	CLO-250	1	F	0	0.9	23.221	49	13	8	5	13
R03-M07	R03	1	CLO-250	1	M	1	0.7	20.072	47	13	8	5	13
R03-M08	R03	1	CLO-250	1	M	1	1	24	50	13	8	5	13
R03-M09	R03	1	CLO-250	1	M	1	0.9	23.591	50	13	8	5	13
R03-M10	R03	1	CLO-250	1	F	0	0.9	22.352	52	13	8	5	13
R03-M11	R03	1	CLO-250	1	F	0	0.8	22.381	52	13	8	5	13
R03-M12	R03	1	CLO-250	1	F	0	0.8	19.981	57	13	8	5	13
R03-M13	R03	1	CLO-250	1	M	1	0.8	20.65	57	13	8	5	13
R03-M14	R03	1	CLO-250	0						7	8	5
R03-M15	R03	1	CLO-250	0						7	8	5
R03-M16	R03	1	CLO-250	0						7	8	5
R03-M17	R03	1	CLO-250	0						7	8	5
R03-M18	R03	1	CLO-250	0						7	8	5
R03-M19	R03	1	CLO-250	0						7	8	5
R03-M20	R03	1	CLO-250	0						7	8	5
R04-M01	R04	4	CLO-250	1	M	1	0.9	22.067	46	18	13	5	18
R04-M02	R04	4	CLO-250	1	M	1	0.7	22.736	44	18	13	5	18
R04-M03	R04	4	CLO-250	1	M	1	0.8	22.172	46	18	13	5	18
R04-M04	R04	4	CLO-250	1	F	0	0.7	21.933	46	18	13	5	18
R04-M05	R04	4	CLO-250	1	M	1	0.7	21.813	44	18	13	5	18
R04-M06	R04	4	CLO-250	1	M	1	0.8	22.671	45	18	13	5	18
R04-M07	R04	4	CLO-250	1	M	1	0.7	22.417	46	18	13	5	18
R04-M08	R04	4	CLO-250	1	M	1	0.8	21.967	47	18	13	5	18
R04-M09	R04	4	CLO-250	1	M	1	0.7	21.905	47	18	13	5	18
R04-M10	R04	4	CLO-250	0						2	13	5	18
R04-M11	R04	4	CLO-250	1	F	0	0.7	21.442	47	18	13	5	18
R04-M12	R04	4	CLO-250	1	F	0	0.8	19.875	49	18	13	5	18
R04-M13	R04	4	CLO-250	1	M	1	0.9	23.295	49	18	13	5	18
R04-M14	R04	4	CLO-250	1	M	1	1	22.942	49	18	13	5	18
R04-M15	R04	4	CLO-250	1	F	0	0.9	23.022	49	18	13	5	18
R04-M16	R04	4	CLO-250	1	M	1	0.8	22.263	50	18	13	5	18
R04-M17	R04	4	CLO-250	1	M	1	0.9		52	18	13	5	18
R04-M18	R04	4	CLO-250	1	F	0	0.9	21.843	52	18	13	5	18
R04-M19	R04	4	CLO-250	1	M	1	0.8	21.454	53	18	13	5	18
R04-M20	R04	4	CLO-250	0						2	13	5	18
R05-M01	R05	2	CLO-250	1	M	1	0.7	20.218	42	16	11	5	16
R05-M02	R05	2	CLO-250	1	M	1	0.6	20.411	45	16	11	5	16
R05-M03	R05	2	CLO-250	1	M	1	0.8			16	11	5	16
R05-M04	R05	2	CLO-250	1	M	1	0.7	21.159	46	16	11	5	16
R05-M05	R05	2	CLO-250	1	M	1	0.7	19.871	46	16	11	5	16
R05-M06	R05	2	CLO-250	1	F	0	0.8	22.362	46	16	11	5	16
R05-M07	R05	2	CLO-250	1	F	0	0.7	21.858	46	16	11	5	16
R05-M08	R05	2	CLO-250	1			0.9	20.834	46	16	11	5	16
R05-M09	R05	2	CLO-250	1	F	0	0.7	21.761	46	16	11	5	16
R05-M10	R05	2	CLO-250	1	M	1	0.9	22.957	46	16	11	5	16
R05-M11	R05	2	CLO-250	1	M	1	0.7	22.532	47	16	11	5	16
R05-M12	R05	2	CLO-250	1	M	1	0.7	22.012	47	16	11	5	16
R05-M13	R05	2	CLO-250	1	M	1	0.8	22.374	46	16	11	5	16
R05-M14	R05	2	CLO-250	1	M	1	0.8		46	16	11	5	16
R05-M15	R05	2	CLO-250	1	M	1	0.7	21.848	49	16	11	5	16
R05-M16	R05	2	CLO-250	1	F	0	0.8	22.038	49	16	11	5	16
R05-M17	R05	2	CLO-250	1	F	0	1	20.066	52	16	11	5	16
R05-M18	R05	2	CLO-250	0						4	11	5	16
R05-M19	R05	2	CLO-250	0						4	11	5	16
R05-M20	R05	2	CLO-250	0						4	11	5	16
T01-M01	T01	4	THI-2.5	1	F	0	0.9	22.098	43	13	5	8	13
T01-M02	T01	4	THI-2.5	1	M	1	0.9	22.244	44	13	5	8	13
T01-M03	T01	4	THI-2.5	1	M	1	0.8	22.612	45	13	5	8	13
T01-M04	T01	4	THI-2.5	1	M	1	1	22.07	45	13	5	8	13
T01-M05	T01	4	THI-2.5	1	F	0	0.8	22.501	45	13	5	8	13
T01-M06	T01	4	THI-2.5	1	M	1	0.8	21.932	45	13	5	8	13
T01-M07	T01	4	THI-2.5	1	M	1	0.8	22.348	45	13	5	8	13
T01-M08	T01	4	THI-2.5	1	F	0	0.7	23.238	49	13	5	8	13
T01-M09	T01	4	THI-2.5	1	F	0	0.9	22.908	50	13	5	8	13
T01-M10	T01	4	THI-2.5	1	F	0	1	21.535	50	13	5	8	13
T01-M11	T01	4	THI-2.5	1	F	0	1	20.96	50	13	5	8	13
T01-M12	T01	4	THI-2.5	1	F	0	0.7	20.929	50	13	5	8	13
T01-M13	T01	4	THI-2.5	1	F	0	0.9	21.948	52	13	5	8	13
T01-M14	T01	4	THI-2.5	0	F					7	5	8
T01-M15	T01	4	THI-2.5	0						7	5	8
T01-M16	T01	4	THI-2.5	0						7	5	8
T01-M17	T01	4	THI-2.5	0						7	5	8
T01-M18	T01	4	THI-2.5	0						7	5	8
T01-M19	T01	4	THI-2.5	0						7	5	8
T01-M20	T01	4	THI-2.5	0						7	5	8
T02-M01	T02	5	THI-2.5	1	M	1	0.8	24.015	42	19	17	1	18
T02-M02	T02	5	THI-2.5	0							17	1	18
T02-M03	T02	5	THI-2.5	1	M	1	0.7	19.896	45	19	17	1	18
T02-M04	T02	5	THI-2.5	1	M	1	0.8	21.94	42	19	17	1	18
T02-M05	T02	5	THI-2.5	1	M	1	0.6	19.038	45	19	17	1	18
T02-M06	T02	5	THI-2.5	1	M	1	0.7	20.803	45	19	17	1	18
T02-M07	T02	5	THI-2.5	1	M	1	0.7	21.696	45	19	17	1	18
T02-M08	T02	5	THI-2.5	1	M	1	0.7	21.351	45	19	17	1	18
T02-M09	T02	5	THI-2.5	1	M	1	0.7	21.812	46	19	17	1	18
T02-M10	T02	5	THI-2.5	1	M	1	0.8	21.163	46	19	17	1	18
T02-M11	T02	5	THI-2.5	1	M	1	1	21.924	46	19	17	1	18
T02-M12	T02	5	THI-2.5	1	M	1	0.8	22.158	46	19	17	1	18
T02-M13	T02	5	THI-2.5	1	M	1	0.7	21.545	46	19	17	1	18
T02-M14	T02	5	THI-2.5	1			0.7	21.953	45	19	17	1	18
T02-M15	T02	5	THI-2.5	1	M	1	0.5	18.767	46	19	17	1	18
T02-M16	T02	5	THI-2.5	1	M	1	0.9	22.669	45	19	17	1	18
T02-M17	T02	5	THI-2.5	1	M	1	0.7	21.891	49	19	17	1	18
T02-M18	T02	5	THI-2.5	1	M	1	0.8	22.39	47	19	17	1	18
T02-M19	T02	5	THI-2.5	1	F	0	0.8	23.064	47	19	17	1	18
T02-M20	T02	5	THI-2.5	1	M	1	0.8	23.015	49	19	17	1	18
T03-M01	T03	3	THI-2.5	1	F	0	0.8	22.208	43	13	7	6	13
T03-M02	T03	3	THI-2.5	1	M	1	0.8	22.572	45	13	7	6	13
T03-M03	T03	3	THI-2.5	1	F	0	0.7	21.739	46	13	7	6	13
T03-M04	T03	3	THI-2.5	1	M	1	0.9	24.137	45	13	7	6	13
T03-M05	T03	3	THI-2.5	1	M	1	1	23.277	47	13	7	6	13
T03-M06	T03	3	THI-2.5	1	F	0	0.8	24.409	47	13	7	6	13
T03-M07	T03	3	THI-2.5	1	M	1	0.9	23.181	47	13	7	6	13
T03-M08	T03	3	THI-2.5	1	M	1	0.9	22.153	47	13	7	6	13
T03-M09	T03	3	THI-2.5	1	F	0	0.8	22.513	47	13	7	6	13
T03-M10	T03	3	THI-2.5	1	F	0	0.8	21.779	49	13	7	6	13
T03-M11	T03	3	THI-2.5	1	F	0	0.7	22.911	49	13	7	6	13
T03-M12	T03	3	THI-2.5	1	M	1	1	23.16	49	13	7	6	13
T03-M13	T03	3	THI-2.5	1	M	1	0.9	21.774	52	13	7	6	13
T03-M14	T03	3	THI-2.5	0						7	7	6
T03-M15	T03	3	THI-2.5	0						7	7	6
T03-M16	T03	3	THI-2.5	0						7	7	6
T03-M17	T03	3	THI-2.5	0						7	7	6
T03-M18	T03	3	THI-2.5	0						7	7	6
T03-M19	T03	3	THI-2.5	0						7	7	6
T03-M20	T03	3	THI-2.5	0						7	7	6
T04-M01	T04	2	THI-2.5	1	M	1	0.6	20.825	44	18	8	10	18
T04-M02	T04	2	THI-2.5	1	M	1	0.7	21.619	46	18	8	10	18
T04-M03	T04	2	THI-2.5	1	M	1	0.5	20.761	46	18	8	10	18
T04-M04	T04	2	THI-2.5	1	M	1	0.8	22.037	46	18	8	10	18
T04-M05	T04	2	THI-2.5	1	F	0	0.7	21.341	46	18	8	10	18
T04-M06	T04	2	THI-2.5	1	F	0	0.7	21.522	44	18	8	10	18
T04-M07	T04	2	THI-2.5	1	M	1	0.8	23.414	45	18	8	10	18
T04-M08	T04	2	THI-2.5	1	F	0	0.8	21.028	45	18	8	10	18
T04-M09	T04	2	THI-2.5	1	M	1	0.7	21.128	45	18	8	10	18
T04-M10	T04	2	THI-2.5	1	F	0	0.7	20.672	45	18	8	10	18
T04-M11	T04	2	THI-2.5	1	F	0	0.8	21.82	45	18	8	10	18
T04-M12	T04	2	THI-2.5	1	F	0	0.7	22.021	46	18	8	10	18
T04-M13	T04	2	THI-2.5	1	F	0	0.8	22.97	47	18	8	10	18
T04-M14	T04	2	THI-2.5	1	F	0	0.6	20.873	47	18	8	10	18
T04-M15	T04	2	THI-2.5	1	M	1	0.8	19.685	47	18	8	10	18
T04-M16	T04	2	THI-2.5	1	F	0	0.7	19.661	49	18	8	10	18
T04-M17	T04	2	THI-2.5	1	F	0	0.9	22.715	49	18	8	10	18
T04-M18	T04	2	THI-2.5	1	M	1	0.8	22.108	50	18	8	10	18
T04-M19	T04	2	THI-2.5	0						2	8	10
T04-M20	T04	2	THI-2.5	0						2	8	10
T05-M02	T05	1	THI-2.5	1	F	0	0.8	22.461	44	11	6	5	11
T05-M03	T05	1	THI-2.5	1	F	0	0.9	22.383	45	11	6	5	11
T05-M04	T05	1	THI-2.5	1	F	0	0.8	22.402	43	11	6	5	11
T05-M05	T05	1	THI-2.5	1	M	1	0.9	21.715	46	11	6	5	11
T05-M06	T05	1	THI-2.5	1	F	0	1	22.617	46	11	6	5	11
T05-M07	T05	1	THI-2.5	1	M	1	0.8	24.019	46	11	6	5	11
T05-M08	T05	1	THI-2.5	1	M	1	0.9	23.295	46	11	6	5	11
T05-M09	T05	1	THI-2.5	1	M	1	0.8	21.575	46	11	6	5	11
T05-M10	T05	1	THI-2.5	1	F	0	0.7	21.474	45	11	6	5	11
T05-M11	T05	1	THI-2.5	1	M	1	1	22.414	47	11	6	5	11
T05-M12	T05	1	THI-2.5	1	M	1	1.1	22.341	46	11	6	5	11
T05-M13	T05	1	THI-2.5	0						9	6	5
T05-M14	T05	1	THI-2.5	0						9	6	5
T05-M15	T05	1	THI-2.5	0						9	6	5
T05-M16	T05	1	THI-2.5	0						9	6	5
T05-M17	T05	1	THI-2.5	0						9	6	5
T05-M18	T05	1	THI-2.5	0						9	6	5
T05-M19	T05	1	THI-2.5	0						9	6	5
T05-M20	T05	1	THI-2.5	0						9	6	5
T05-M01	T05	1	THI-2.5	0	F					9	6	5
Y01-M01	Y01	2	THI-250	1	M	1	0.8	23.518	46	13	8	5	13
Y01-M02	Y01	2	THI-250	1	F	0	0.9	21.445	46	13	8	5	13
Y01-M03	Y01	2	THI-250	1	F	0	0.8	21.5	47	13	8	5	13
Y01-M04	Y01	2	THI-250	1	M	1	0.8	24.755	47	13	8	5	13
Y01-M05	Y01	2	THI-250	1	M	1	0.8	22.902	49	13	8	5	13
Y01-M06	Y01	2	THI-250	1	M	1	0.8	22.923	49	13	8	5	13
Y01-M07	Y01	2	THI-250	1	F	0	0.8	22.705	49	13	8	5	13
Y01-M08	Y01	2	THI-250	1	F	0	0.8	22.505	49	13	8	5	13
Y01-M09	Y01	2	THI-250	1	F	0	0.7	22.157	49	13	8	5	13
Y01-M10	Y01	2	THI-250	1	M	1	0.8	22.307	49	13	8	5	13
Y01-M11	Y01	2	THI-250	1	M	1	0.8	21.552	49	13	8	5	13
Y01-M12	Y01	2	THI-250	1	M	1	1	22.724	49	13	8	5	13
Y01-M13	Y01	2	THI-250	1	M	1	0.8	22.812	49	13	8	5	13
Y01-M14	Y01	2	THI-250	0						7	8	5
Y01-M15	Y01	2	THI-250	0						7	8	5
Y01-M16	Y01	2	THI-250	0						7	8	5
Y01-M17	Y01	2	THI-250	0						7	8	5
Y01-M18	Y01	2	THI-250	0						7	8	5
Y01-M19	Y01	2	THI-250	0						7	8	5
Y01-M20	Y01	2	THI-250	0						7	8	5
Y02-M01	Y02	1	THI-250	1	F	0	0.9	23.234	42	14	7	6	13
Y02-M02	Y02	1	THI-250	1	M	1	1	23.736	44	14	7	6	13
Y02-M03	Y02	1	THI-250	1	M	1	0.5	17.416	44	14	7	6	13
Y02-M04	Y02	1	THI-250	1	M	1	0.9	22.935	44	14	7	6	13
Y02-M05	Y02	1	THI-250	1	M	1	0.9	21.874	45	14	7	6	13
Y02-M06	Y02	1	THI-250	1	M	1	0.8	23.873	46	14	7	6	13
Y02-M07	Y02	1	THI-250	1			0.9	23.062	44	14	7	6	13
Y02-M08	Y02	1	THI-250	1	M	1	0.9	25.025	45	14	7	6	13
Y02-M09	Y02	1	THI-250	1	F	0	0.8	22.517	45	14	7	6	13
Y02-M10	Y02	1	THI-250	1	F	0	0.9	24.395	47	14	7	6	13
Y02-M11	Y02	1	THI-250	1	M	1	1	24.028	47	14	7	6	13
Y02-M12	Y02	1	THI-250	1	F	0	0.9	22.791	47	14	7	6	13
Y02-M13	Y02	1	THI-250	1	F	0	1	24.087	50	14	7	6	13
Y02-M14	Y02	1	THI-250	1	F	0	0.9	20.967	52	14	7	6	13
Y02-M15	Y02	1	THI-250	0						6	7	6
Y02-M16	Y02	1	THI-250	0						6	7	6
Y02-M17	Y02	1	THI-250	0						6	7	6
Y02-M18	Y02	1	THI-250	0						6	7	6
Y02-M19	Y02	1	THI-250	0						6	7	6
Y02-M20	Y02	1	THI-250	0						6	7	6
Y03-M01	Y03	3	THI-250	1	F	0	0.7	22.376	45	14	8	6	14
Y03-M02	Y03	3	THI-250	1	M	1	0.7	20.961	46	14	8	6	14
Y03-M03	Y03	3	THI-250	1	M	1	0.6	21.543	49	14	8	6	14
Y03-M04	Y03	3	THI-250	1	F	0	0.7	22.395	49	14	8	6	14
Y03-M05	Y03	3	THI-250	1	M	1	0.7	21.225	49	14	8	6	14
Y03-M06	Y03	3	THI-250	1	M	1	0.6	21.244	49	14	8	6	14
Y03-M07	Y03	3	THI-250	1	M	1	0.6	20.218	49	14	8	6	14
Y03-M08	Y03	3	THI-250	1	F	0	0.8	22.896	49	14	8	6	14
Y03-M09	Y03	3	THI-250	1	M	1	0.7	21.924	50	14	8	6	14
Y03-M10	Y03	3	THI-250	1	F	0	1	22.644	50	14	8	6	14
Y03-M11	Y03	3	THI-250	1	F	0	0.8	22.337	53	14	8	6	14
Y03-M12	Y03	3	THI-250	1	M	1	0.6	20.948	52	14	8	6	14
Y03-M13	Y03	3	THI-250	1	F	0	0.8	22.353	52	14	8	6	14
Y03-M14	Y03	3	THI-250	1	M	1	0.6	19.994	52	14	8	6	14
Y03-M15	Y03	3	THI-250	0						6	8	6
Y03-M16	Y03	3	THI-250	0						6	8	6
Y03-M17	Y03	3	THI-250	0						6	8	6
Y03-M18	Y03	3	THI-250	0						6	8	6
Y03-M19	Y03	3	THI-250	0						6	8	6
Y03-M20	Y03	3	THI-250	0						6	8	6
Y04-M01	Y04	4	THI-250	1	M	1	0.5	21.151	45	16	12	4	16
Y04-M02	Y04	4	THI-250	1	M	1	0.9	23.467	45	16	12	4	16
Y04-M03	Y04	4	THI-250	1	M	1	0.9	23.813	45	16	12	4	16
Y04-M04	Y04	4	THI-250	1	M	1	0.9	22.981	46	16	12	4	16
Y04-M05	Y04	4	THI-250	1	M	1	0.8	22.759	46	16	12	4	16
Y04-M06	Y04	4	THI-250	1	F	0	0.9	23.422	47	16	12	4	16
Y04-M07	Y04	4	THI-250	1	M	1	1.1	24.902	47	16	12	4	16
Y04-M08	Y04	4	THI-250	1	F	0	0.9	23.419	49	16	12	4	16
Y04-M09	Y04	4	THI-250	1	M	1	1	24.243	49	16	12	4	16
Y04-M10	Y04	4	THI-250	1	M	1	1	24.979	49	16	12	4	16
Y04-M11	Y04	4	THI-250	1	M	1	0.9	22.661	50	16	12	4	16
Y04-M12	Y04	4	THI-250	1	M	1	1	22.296	50	16	12	4	16
Y04-M13	Y04	4	THI-250	1	F	0	0.8	24.054	52	16	12	4	16
Y04-M14	Y04	4	THI-250	1	F	0	1	21.001	52	16	12	4	16
Y04-M15	Y04	4	THI-250	1	M	1	1	23.41	52	16	12	4	16
Y04-M16	Y04	4	THI-250	1	M	1	1.1	21.86	53	16	12	4	16
Y04-M17	Y04	4	THI-250	0						4	12	4
Y04-M18	Y04	4	THI-250	0						4	12	4
Y04-M19	Y04	4	THI-250	0						4	12	4
Y04-M20	Y04	4	THI-250	0						4	12	4
Y05-M04	Y05	5	THI-250	1	M	1	0.8	22.6	43	13	9	4	13
Y05-M05	Y05	5	THI-250	1	M	1	0.8	20.79	46	13	9	4	13
Y05-M06	Y05	5	THI-250	1	M	1	0.8	23.016	44	13	9	4	13
Y05-M07	Y05	5	THI-250	1	M	1	0.8	19.645	46	13	9	4	13
Y05-M08	Y05	5	THI-250	1	M	1	0.9	20.915	45	13	9	4	13
Y05-M09	Y05	5	THI-250	1	M	1	0.8	22.573	47	13	9	4	13
Y05-M10	Y05	5	THI-250	1	F	0	0.7	22.071	46	13	9	4	13
Y05-M11	Y05	5	THI-250	1	M	1	0.7	21.639	46	13	9	4	13
Y05-M12	Y05	5	THI-250	1	M	1	0.8	22.372	49	13	9	4	13
Y05-M13	Y05	5	THI-250	1	F	0	0.7	21.449	49	13	9	4	13
Y05-M14	Y05	5	THI-250	1	F	0	0.7	22.707	49	13	9	4	13
Y05-M15	Y05	5	THI-250	1	F	0	0.9	22.514	49	13	9	4	13
Y05-M16	Y05	5	THI-250	1	M	1	0.6	21.919	49	13	9	4	13
Y05-M17	Y05	5	THI-250	0						7	9	4
Y05-M18	Y05	5	THI-250	0						7	9	4
Y05-M19	Y05	5	THI-250	0						7	9	4
Y05-M20	Y05	5	THI-250	0						7	9	4
Y05-M01	Y05	5	THI-250	0	F	0				7	9	4
Y05-M02	Y05	5	THI-250	0	F	0				7	9	4
Y05-M03	Y05	5	THI-250	0	F	0				7	9	4

## Sheet: LFResponse
Frog_ID	Tank	Block	Treatment	Survival	Sex	Sex2	Mass	Length	Days	Stage	count_survival	count_male	count_female	count_sexed
LG01-01	LG01	1	Acontrol	1	F	0	1.7	30.747	54	46	18	9	7	16
LG01-02	LG01	1	Acontrol	1	M	1	1.2	27.74	54	46	18	9	7	16
LG01-03	LG01	1	Acontrol	1	F	0	0.7	21.921	54	46	18	9	7	16
LG01-04	LG01	1	Acontrol	1	M	1	1.5	30.329	55	46	18	9	7	16
LG01-05	LG01	1	Acontrol	1	M	1	1.2	27.93	55	46	18	9	7	16
LG01-06	LG01	1	Acontrol	1	F	0	1.7	31.627	55	46	18	9	7	16
LG01-07	LG01	1	Acontrol	1	F	0	1.4	29.625	55	46	18	9	7	16
LG01-08	LG01	1	Acontrol	1	M	1	1.5	28.842	55	46	18	9	7	16
LG01-09	LG01	1	Acontrol	1	M	1	1.3	29.374	56	46	18	9	7	16
LG01-10	LG01	1	Acontrol	1	M	1	1.4	28.968	60	46	18	9	7	16
LG01-11	LG01	1	Acontrol	1	M	1	1.4	28.203	60	46	18	9	7	16
LG01-12	LG01	1	Acontrol	1	F	0	1.4	27.817	60	46	18	9	7	16
LG01-13	LG01	1	Acontrol	1	F	0	1.7	31.526	67	46	18	9	7	16
LG01-14	LG01	1	Acontrol	1	M	1	1.6	27.77	67	46	18	9	7	16
LG01-15	LG01	1	Acontrol	1	F	0	2.1	34.489	67	46	18	9	7	16
LG01-16	LG01	1	Acontrol	1	M	1	1.6	31.734	60	46	18	9	7	16
LG01-17	LG01	1	Acontrol	1			2.9			37	18	9	7
LG01-18	LG01	1	Acontrol	1			3			40	18	9	7
LG01-19	LG01	1	Acontrol	0							2	9	7
LG01-20	LG01	1	Acontrol	0							2	9	7
LG03-01	LG03	2	Acontrol	1	M	1	0.9	25.313	54	46	18	4	7	11
LG03-02	LG03	2	Acontrol	1	F	0	0.9	24.484	55	46	18	4	7	11
LG03-03	LG03	2	Acontrol	1	M	1	1.2	28.054	55	46	18	4	7	11
LG03-04	LG03	2	Acontrol	1	F	0	0.7	24.341	55	46	18	4	7	11
LG03-05	LG03	2	Acontrol	1	F	0	0.8	23.487	55	46	18	4	7	11
LG03-06	LG03	2	Acontrol	1	F	0	0.9	24.536	56	46	18	4	7	11
LG03-07	LG03	2	Acontrol	1	M	1	1.2	27.259	56	46	18	4	7	11
LG03-08	LG03	2	Acontrol	1	F	0	1.1	26.257	60	46	18	4	7	11
LG03-09	LG03	2	Acontrol	1	F	0	1.1	25.195	62	46	18	4	7	11
LG03-10	LG03	2	Acontrol	1	F	0	0.9	24.852	62	46	18	4	7	11
LG03-11	LG03	2	Acontrol	1	M	1	1.5	28.773	67	46	18	4	7	11
LG03-12	LG03	2	Acontrol	1			1.7			44	18	4	7
LG03-13	LG03	2	Acontrol	1			1.3			31	18	4	7
LG03-14	LG03	2	Acontrol	1			2.8			36	18	4	7
LG03-15	LG03	2	Acontrol	1			5.6			41	18	4	7
LG03-16	LG03	2	Acontrol	1			5.9			40	18	4	7
LG03-17	LG03	2	Acontrol	1			5.2			32	18	4	7
LG03-18	LG03	2	Acontrol	1			1.1			43	18	4	7
LG03-19	LG03	2	Acontrol	0							2	4	7
LG03-20	LG03	2	Acontrol	0							2	4	7
LG05-01	LG05	3	Acontrol	1	F	0	1.1	26.442	64	46	16	4	8	12
LG05-02	LG05	3	Acontrol	1	F	0	0.8	24.722	54	46	16	4	8	12
LG05-03	LG05	3	Acontrol	1	F	0	1.4	29.088	54	46	16	4	8	12
LG05-04	LG05	3	Acontrol	1	M	1	0.8	23.876	54	46	16	4	8	12
LG05-05	LG05	3	Acontrol	1	M	1	1	24.445	54	46	16	4	8	12
LG05-06	LG05	3	Acontrol	1	F	0	1	27.15	56	46	16	4	8	12
LG05-07	LG05	3	Acontrol	1	F	0	0.7	22.467	60	46	16	4	8	12
LG05-08	LG05	3	Acontrol	1	F	0	1	26.337	60	46	16	4	8	12
LG05-09	LG05	3	Acontrol	1	M	1	1.2	26.93	60	46	16	4	8	12
LG05-10	LG05	3	Acontrol	1	F	0	0.9	23.805	62	46	16	4	8	12
LG05-11	LG05	3	Acontrol	1	M	1	1.5	29.528	64	46	16	4	8	12
LG05-12	LG05	3	Acontrol	1	F	0	1.3	28.025	67	46	16	4	8	12
LG05-13	LG05	3	Acontrol	1			2.6			40	16	4	8
LG05-14	LG05	3	Acontrol	1			2.1			44	16	4	8
LG05-15	LG05	3	Acontrol	1			1.9			45	16	4	8
LG05-16	LG05	3	Acontrol	1			3.4			37	16	4	8
LG05-17	LG05	3	Acontrol	0							4	4	8
LG05-18	LG05	3	Acontrol	0							4	4	8
LG05-19	LG05	3	Acontrol	0							4	4	8
LG05-20	LG05	3	Acontrol	0							4	4	8
LG04-01	LG04	4	Acontrol	1	F	0	1.1	26.318	53	46	15	2	6	8
LG04-02	LG04	4	Acontrol	1	M	1	0.8	22.73	55	46	15	2	6	8
LG04-03	LG04	4	Acontrol	1	M	1	1.1	26.845	55	46	15	2	6	8
LG04-04	LG04	4	Acontrol	1	F	0	0.6	23.418	55	46	15	2	6	8
LG04-05	LG04	4	Acontrol	1	F	0	0.8	24.895	56	46	15	2	6	8
LG04-06	LG04	4	Acontrol	1	F	0	0.9	24.555	56	46	15	2	6	8
LG04-07	LG04	4	Acontrol	1	F	0	1.2	27.509	57	46	15	2	6	8
LG04-08	LG04	4	Acontrol	1	F	0	1	25.088	60	46	15	2	6	8
LG04-09	LG04	4	Acontrol	1			3.1			40	15	2	6
LG04-10	LG04	4	Acontrol	1			3.9			40	15	2	6
LG04-11	LG04	4	Acontrol	1			2.5			36	15	2	6
LG04-12	LG04	4	Acontrol	1			3			40	15	2	6
LG04-13	LG04	4	Acontrol	1			1.5			42	15	2	6
LG04-14	LG04	4	Acontrol	1			1.8			43	15	2	6
LG04-15	LG04	4	Acontrol	1			1.8			42	15	2	6
LG04-16	LG04	4	Acontrol	0							5	2	6
LG04-17	LG04	4	Acontrol	0							5	2	6
LG04-18	LG04	4	Acontrol	0							5	2	6
LG04-19	LG04	4	Acontrol	0							5	2	6
LG04-20	LG04	4	Acontrol	0							5	2	6
LG02-01	LG02	5	Acontrol	1	F	0	1.3	21.13	49	46	18	12	6	18
LG02-02	LG02	5	Acontrol	1	F	0	1	25.896	50	46	18	12	6	18
LG02-03	LG02	5	Acontrol	1	F	0	1.5	29.001	50	46	18	12	6	18
LG02-04	LG02	5	Acontrol	1	M	1	1.4	28.916	50	46	18	12	6	18
LG02-05	LG02	5	Acontrol	1	F	0	1.1	24.38	50	46	18	12	6	18
LG02-06	LG02	5	Acontrol	1	M	1	0.7	20.601	54	46	18	12	6	18
LG02-07	LG02	5	Acontrol	1	M	1	1.2	26.113	54	46	18	12	6	18
LG02-08	LG02	5	Acontrol	1	M	1	1.3	26.786	54	46	18	12	6	18
LG02-09	LG02	5	Acontrol	1	M	1	1.1	26.734	54	46	18	12	6	18
LG02-10	LG02	5	Acontrol	1	M	1	0.9	23.134	54	46	18	12	6	18
LG02-11	LG02	5	Acontrol	1	M	1	1.1	26.342	54	46	18	12	6	18
LG02-12	LG02	5	Acontrol	1	F	0	1.7	30.562	55	46	18	12	6	18
LG02-13	LG02	5	Acontrol	1	M	1	1.2	28.662	55	46	18	12	6	18
LG02-14	LG02	5	Acontrol	1	M	1	1.2	28.009	55	46	18	12	6	18
LG02-15	LG02	5	Acontrol	1	M	1	1.2	27.27	55	46	18	12	6	18
LG02-16	LG02	5	Acontrol	1	M	1	1.6	30.379	60	46	18	12	6	18
LG02-17	LG02	5	Acontrol	1	M	1	2	33.765	64	46	18	12	6	18
LG02-18	LG02	5	Acontrol	1	F	0	2		67	46	18	12	6	18
LG02-19	LG02	5	Acontrol	0							2	12	6
LG02-20	LG02	5	Acontrol	0							2	12	6
LP04-01	LP04	1	CLO-2.5	1	F	0	1.1	26.972	53	46	17	6	9	15
LP04-02	LP04	1	CLO-2.5	1	F	0	0.9	25.214	53	46	17	6	9	15
LP04-03	LP04	1	CLO-2.5	1	M	1	1.4	28.324	53	46	17	6	9	15
LP04-04	LP04	1	CLO-2.5	1	M	1	1	24.896	53	46	17	6	9	15
LP04-05	LP04	1	CLO-2.5	1	F	0	0.7	23.242	53	46	17	6	9	15
LP04-06	LP04	1	CLO-2.5	1	F	0	0.9	24.259	53	46	17	6	9	15
LP04-07	LP04	1	CLO-2.5	1	M	1	0.8	23.284	53	46	17	6	9	15
LP04-08	LP04	1	CLO-2.5	1	F	0	0.8	23.326	53	46	17	6	9	15
LP04-09	LP04	1	CLO-2.5	1	M	1	1	25.672	55	46	17	6	9	15
LP04-10	LP04	1	CLO-2.5	1	F	0	1.1	27.381	55	46	17	6	9	15
LP04-11	LP04	1	CLO-2.5	1	F	0	1.2	27.83	55	46	17	6	9	15
LP04-12	LP04	1	CLO-2.5	1	F	0	1.3	29.0169	56	46	17	6	9	15
LP04-13	LP04	1	CLO-2.5	1	M	1	1.4	29.959	56	46	17	6	9	15
LP04-14	LP04	1	CLO-2.5	1	F	0	1.4	26.991	57	46	17	6	9	15
LP04-15	LP04	1	CLO-2.5	1	M	1	1.7	29.527	62	46	17	6	9	15
LP04-16	LP04	1	CLO-2.5	1			6.5			41	17	6	9
LP04-17	LP04	1	CLO-2.5	1			3.9			42	17	6	9
LP04-18	LP04	1	CLO-2.5	0							3	6	9
LP04-19	LP04	1	CLO-2.5	0							3	6	9
LP04-20	LP04	1	CLO-2.5	0							3	6	9
LP02-01	LP02	2	CLO-2.5	1	F	0	1.4	29.439	50	46	20	5	10	15
LP02-02	LP02	2	CLO-2.5	1	F	0	0.8	21.845	53	46	20	5	10	15
LP02-03	LP02	2	CLO-2.5	1	M	1	1.1	26.9	53	46	20	5	10	15
LP02-04	LP02	2	CLO-2.5	1	F	0	1	25.685	53	46	20	5	10	15
LP02-05	LP02	2	CLO-2.5	1	F	0			53	46	20	5	10	15
LP02-06	LP02	2	CLO-2.5	1	M	1	0.9	24.996	55	46	20	5	10	15
LP02-07	LP02	2	CLO-2.5	1	F	0	0.8	21.134	57	46	20	5	10	15
LP02-08	LP02	2	CLO-2.5	1	M	1	0.9		60	46	20	5	10	15
LP02-09	LP02	2	CLO-2.5	1	F	0	1.1	26.772	62	46	20	5	10	15
LP02-10	LP02	2	CLO-2.5	1	M	1	0.8	22.93	62	46	20	5	10	15
LP02-11	LP02	2	CLO-2.5	1	F	0	1.1	25.502	64	46	20	5	10	15
LP02-12	LP02	2	CLO-2.5	1	F	0	1.6	29.892	64	46	20	5	10	15
LP02-13	LP02	2	CLO-2.5	1	F	0	0.8	23.577	64	46	20	5	10	15
LP02-14	LP02	2	CLO-2.5	1	F	0	1.1	25.886	67	46	20	5	10	15
LP02-15	LP02	2	CLO-2.5	1	M	1	1.1	26.991	67	46	20	5	10	15
LP02-16	LP02	2	CLO-2.5	1			2.9			39	20	5	10
LP02-17	LP02	2	CLO-2.5	1			4.2			40	20	5	10
LP02-18	LP02	2	CLO-2.5	1			3.9			40	20	5	10
LP02-19	LP02	2	CLO-2.5	1			4			40	20	5	10
LP02-20	LP02	2	CLO-2.5	1			2.8			42	20	5	10
LP05-01	LP05	3	CLO-2.5	1	F	0			53	46	18	2	5	7
LP05-02	LP05	3	CLO-2.5	1	F	0	0.5	18.494	60	46	18	2	5	7
LP05-03	LP05	3	CLO-2.5	1	F	0	0.6	19.846	60	46	18	2	5	7
LP05-04	LP05	3	CLO-2.5	1	M	1	1	25.63	62	46	18	2	5	7
LP05-05	LP05	3	CLO-2.5	1	F	0	0.6	21.337	62	46	18	2	5	7
LP05-06	LP05	3	CLO-2.5	1	M	1	0.5	21.303	62	46	18	2	5	7
LP05-07	LP05	3	CLO-2.5	1	F	0	1.2	27.167	64	46	18	2	5	7
LP05-08	LP05	3	CLO-2.5	1			2.5			40	18	2	5
LP05-09	LP05	3	CLO-2.5	1			4.2			40	18	2	5
LP05-10	LP05	3	CLO-2.5	1			3.6			40	18	2	5
LP05-11	LP05	3	CLO-2.5	1			3.3			40	18	2	5
LP05-12	LP05	3	CLO-2.5	1			3.5			40	18	2	5
LP05-13	LP05	3	CLO-2.5	1			1.2			44	18	2	5
LP05-14	LP05	3	CLO-2.5	1			1.3			45	18	2	5
LP05-15	LP05	3	CLO-2.5	1						46	18	2	5
LP05-16	LP05	3	CLO-2.5	1			3.7			39	18	2	5
LP05-17	LP05	3	CLO-2.5	1			2.7			35	18	2	5
LP05-18	LP05	3	CLO-2.5	1			1.8			44	18	2	5
LP05-19	LP05	3	CLO-2.5	0							2	2	5
LP05-20	LP05	3	CLO-2.5	0							2	2	5
LP01-01	LP01	4	CLO-2.5	1	F	0	1	26.716	57	46	14	0	4	4
LP01-02	LP01	4	CLO-2.5	1	F	0	0.8	24.301	60	46	14	0	4	4
LP01-03	LP01	4	CLO-2.5	1	F	0	0.7	22.822	64	46	14	0	4	4
LP01-04	LP01	4	CLO-2.5	1	F	0	0.9	24.952	67	46	14	0	4	4
LP01-05	LP01	4	CLO-2.5	1			1.6			45	14	0	4
LP01-06	LP01	4	CLO-2.5	1			3.2			42	14	0	4
LP01-07	LP01	4	CLO-2.5	1			4.4			41	14	0	4
LP01-08	LP01	4	CLO-2.5	1			2.1			40	14	0	4
LP01-09	LP01	4	CLO-2.5	1			2.5			36	14	0	4
LP01-10	LP01	4	CLO-2.5	1			3.8			40	14	0	4
LP01-11	LP01	4	CLO-2.5	1			3.2			41	14	0	4
LP01-12	LP01	4	CLO-2.5	1			3.8			39	14	0	4
LP01-13	LP01	4	CLO-2.5	1			5.1			40	14	0	4
LP01-14	LP01	4	CLO-2.5	1			2.7			40	14	0	4
LP01-15	LP01	4	CLO-2.5	0							6	0	4
LP01-16	LP01	4	CLO-2.5	0							6	0	4
LP01-17	LP01	4	CLO-2.5	0							6	0	4
LP01-18	LP01	4	CLO-2.5	0							6	0	4
LP01-19	LP01	4	CLO-2.5	0							6	0	4
LP01-20	LP01	4	CLO-2.5	0							6	0	4
LP03-01	LP03	5	CLO-2.5	1	F	0	1.7	30.633	50	46	14	6	7	13
LP03-02	LP03	5	CLO-2.5	1	F	0	1.3	28.59	54	46	14	6	7	13
LP03-03	LP03	5	CLO-2.5	1	F	0	1.2	28.379	54	46	14	6	7	13
LP03-04	LP03	5	CLO-2.5	1	M	1	1.5	28.079	54	46	14	6	7	13
LP03-05	LP03	5	CLO-2.5	1	M	1	1.3	29.379	54	46	14	6	7	13
LP03-06	LP03	5	CLO-2.5	1	M	1	1.3	28.582	55	46	14	6	7	13
LP03-07	LP03	5	CLO-2.5	1	M	1	1.1	27.317	55	46	14	6	7	13
LP03-08	LP03	5	CLO-2.5	1	M	1	1.8	30.313	55	46	14	6	7	13
LP03-09	LP03	5	CLO-2.5	1	F	0	0.7	26.145	55	46	14	6	7	13
LP03-10	LP03	5	CLO-2.5	1	M	1	1.4	30.86	56	46	14	6	7	13
LP03-11	LP03	5	CLO-2.5	1	F	0	1.2	28.049	56	46	14	6	7	13
LP03-12	LP03	5	CLO-2.5	1	F	0	1	24.773	56	46	14	6	7	13
LP03-13	LP03	5	CLO-2.5	1	F	0	1.7	33.044	62	46	14	6	7	13
LP03-14	LP03	5	CLO-2.5	1			8.7			40	14	6	7
LP03-15	LP03	5	CLO-2.5	0							6	6	7
LP03-16	LP03	5	CLO-2.5	0							6	6	7
LP03-17	LP03	5	CLO-2.5	0							6	6	7
LP03-18	LP03	5	CLO-2.5	0							6	6	7
LP03-19	LP03	5	CLO-2.5	0							6	6	7
LP03-20	LP03	5	CLO-2.5	0							6	6	7
LR03-01	LR03	1	CLO-250	1	F	0	0.8	23.352	49	46	19	6	11	17
LR03-02	LR03	1	CLO-250	1	M	1	1.1	26.099	53	46	19	6	11	17
LR03-03	LR03	1	CLO-250	1	F	0	1.2	27.423	53	46	19	6	11	17
LR03-04	LR03	1	CLO-250	1	M	1	1.1	27.586	53	46	19	6	11	17
LR03-05	LR03	1	CLO-250	1	F	0	1	26.757	53	46	19	6	11	17
LR03-06	LR03	1	CLO-250	1	F	0	0.9	25.64	53	46	19	6	11	17
LR03-07	LR03	1	CLO-250	1	F	0	0.8	23.791	53	46	19	6	11	17
LR03-08	LR03	1	CLO-250	1	F	0	1.2	25.164	53	46	19	6	11	17
LR03-09	LR03	1	CLO-250	1	M	1	0.8	22.732	53	46	19	6	11	17
LR03-10	LR03	1	CLO-250	1	M	1	0.8	23.898	53	46	19	6	11	17
LR03-11	LR03	1	CLO-250	1	F	0	1.4	29.813	55	46	19	6	11	17
LR03-12	LR03	1	CLO-250	1	F	0	1.3	27.346	60	46	19	6	11	17
LR03-13	LR03	1	CLO-250	1	M	1	1.6	29.193	62	46	19	6	11	17
LR03-14	LR03	1	CLO-250	1	M	1	1.9	30.349	67	46	19	6	11	17
LR03-15	LR03	1	CLO-250	1	F	0	1.4	25.973	67	46	19	6	11	17
LR03-16	LR03	1	CLO-250	1	F	0	2	29.717	67	46	19	6	11	17
LR03-17	LR03	1	CLO-250	1	F	0	1.3	28.581	67	46	19	6	11	17
LR03-18	LR03	1	CLO-250	1			5.2			41	19	6	11
LR03-19	LR03	1	CLO-250	1			1.5			42	19	6	11
LR03-20	LR03	1	CLO-250	0							1	6	11
LR05-01	LR05	2	CLO-250	1	M	1	0.9	25.742	50	46	15	5	5	10
LR05-02	LR05	2	CLO-250	1	F	0	0.8	22.041	50	46	15	5	5	10
LR05-03	LR05	2	CLO-250	1	F	0	1.1	27.629	54	46	15	5	5	10
LR05-04	LR05	2	CLO-250	1	M	1	1.3	26.971	55	46	15	5	5	10
LR05-05	LR05	2	CLO-250	1	M	1	1.1	25.164	55	46	15	5	5	10
LR05-06	LR05	2	CLO-250	1	F	0	1.1	27.493	56	46	15	5	5	10
LR05-07	LR05	2	CLO-250	1	F	0	0.7	22.216	62	46	15	5	5	10
LR05-08	LR05	2	CLO-250	1	M	1	1.3	28.508	62	46	15	5	5	10
LR05-09	LR05	2	CLO-250	1	M	1	1	23.496	64	46	15	5	5	10
LR05-10	LR05	2	CLO-250	1	F	0	0.9	24.403	67	46	15	5	5	10
LR05-11	LR05	2	CLO-250	1			3.1			40	15	5	5
LR05-12	LR05	2	CLO-250	1			1.5			44	15	5	5
LR05-13	LR05	2	CLO-250	1			5.2			41	15	5	5
LR05-14	LR05	2	CLO-250	1			4.5			31	15	5	5
LR05-15	LR05	2	CLO-250	1			5.6			41	15	5	5
LR05-16	LR05	2	CLO-250	0							5	5	5
LR05-17	LR05	2	CLO-250	0							5	5	5
LR05-18	LR05	2	CLO-250	0							5	5	5
LR05-19	LR05	2	CLO-250	0							5	5	5
LR05-20	LR05	2	CLO-250	0							5	5	5
LR01-01	LR01	3	CLO-250	1	M	1	0.8	25.078	55	46	18	5	4	9
LR01-02	LR01	3	CLO-250	1	M	1	1.2	28.733	56	46	18	5	4	9
LR01-03	LR01	3	CLO-250	1	F	0	0.9	26.333	56	46	18	5	4	9
LR01-04	LR01	3	CLO-250	1	M	1	1.3	26.35	62	46	18	5	4	9
LR01-05	LR01	3	CLO-250	1	F	0	0.9	23.776	62	46	18	5	4	9
LR01-06	LR01	3	CLO-250	1	F	0	0.9	25.452	62	46	18	5	4	9
LR01-07	LR01	3	CLO-250	1	M	1	1.6	28.397	64	46	18	5	4	9
LR01-08	LR01	3	CLO-250	1	M	1	0.9	26.058	67	46	18	5	4	9
LR01-09	LR01	3	CLO-250	1	F	0	0.7	22.901	67	46	18	5	4	9
LR01-10	LR01	3	CLO-250	1			5.2			40	18	5	4
LR01-11	LR01	3	CLO-250	1			1.9			27	18	5	4
LR01-12	LR01	3	CLO-250	1			4.8			41	18	5	4
LR01-13	LR01	3	CLO-250	1			1.3			43	18	5	4
LR01-14	LR01	3	CLO-250	1						45	18	5	4
LR01-15	LR01	3	CLO-250	1			3.3			40	18	5	4
LR01-16	LR01	3	CLO-250	1			3.8			40	18	5	4
LR01-17	LR01	3	CLO-250	1			4.6			41	18	5	4
LR01-18	LR01	3	CLO-250	1			4			40	18	5	4
LR01-19	LR01	3	CLO-250	0							2	5	4
LR01-20	LR01	3	CLO-250	0							2	5	4
LR04-01	LR04	4	CLO-250	1	F	0	1.1	26.475	56	46	18	1	11	12
LR04-02	LR04	4	CLO-250	1	F	0	1.3	30.622	56	46	18	1	11	12
LR04-03	LR04	4	CLO-250	1	M	1	0.9	25.455	60	46	18	1	11	12
LR04-04	LR04	4	CLO-250	1	F	0	1.1	27.663	60	46	18	1	11	12
LR04-05	LR04	4	CLO-250	1	F	0	0.7	22.187	60	46	18	1	11	12
LR04-06	LR04	4	CLO-250	1	F	0	0.9	25.172	62	46	18	1	11	12
LR04-07	LR04	4	CLO-250	1	F	0	0.9	26.53	62	46	18	1	11	12
LR04-08	LR04	4	CLO-250	1	F	0	0.9	24.146	64	46	18	1	11	12
LR04-09	LR04	4	CLO-250	1	F	0	1	25.92	67	46	18	1	11	12
LR04-10	LR04	4	CLO-250	1	F	0	1.1	27.125	67	46	18	1	11	12
LR04-11	LR04	4	CLO-250	1	F	0	1.2	25.074	67	46	18	1	11	12
LR04-12	LR04	4	CLO-250	1	F	0	1.3	29.223	67	46	18	1	11	12
LR04-13	LR04	4	CLO-250	1			1.1			44	18	1	11
LR04-14	LR04	4	CLO-250	1			2.1			35	18	1	11
LR04-15	LR04	4	CLO-250	1			3.3			30	18	1	11
LR04-16	LR04	4	CLO-250	1			6.9			40	18	1	11
LR04-17	LR04	4	CLO-250	1			5.3			40	18	1	11
LR04-18	LR04	4	CLO-250	1			1.9			35	18	1	11
LR04-19	LR04	4	CLO-250	0							2	1	11
LR04-20	LR04	4	CLO-250	0							2	1	11
LR02-01	LR02	5	CLO-250	1	F	0	1	26.042	54	46	19	4	10	14
LR02-02	LR02	5	CLO-250	1	M	1	0.7	21.483	54	46	19	4	10	14
LR02-03	LR02	5	CLO-250	1	F	0	1.5	30.495	55	46	19	4	10	14
LR02-04	LR02	5	CLO-250	1	F	0	0.7	22.637	55	46	19	4	10	14
LR02-05	LR02	5	CLO-250	1	F	0	0.9	24.161	55	46	19	4	10	14
LR02-06	LR02	5	CLO-250	1	F	0	1.1	27.753	56	46	19	4	10	14
LR02-07	LR02	5	CLO-250	1	F	0	1	26.836	56	46	19	4	10	14
LR02-08	LR02	5	CLO-250	1	F	0	0.8	25.351	56	46	19	4	10	14
LR02-09	LR02	5	CLO-250	1	F	0	1.1	28.315	60	46	19	4	10	14
LR02-10	LR02	5	CLO-250	1	F	0	1.3	29.415	60	46	19	4	10	14
LR02-11	LR02	5	CLO-250	1	M	1	1.3	28.251	60	46	19	4	10	14
LR02-12	LR02	5	CLO-250	1	F	0	1.4	30.436	62	46	19	4	10	14
LR02-13	LR02	5	CLO-250	1	M	1	1.8		64	46	19	4	10	14
LR02-14	LR02	5	CLO-250	1	M	1	1.2	26.505	67	46	19	4	10	14
LR02-15	LR02	5	CLO-250	1			3			46	19	4	10
LR02-16	LR02	5	CLO-250	1			5.9			40	19	4	10
LR02-17	LR02	5	CLO-250	1			4			42	19	4	10
LR02-18	LR02	5	CLO-250	1			4.6			40	19	4	10
LR02-19	LR02	5	CLO-250	1			2.7			43	19	4	10
LR02-20	LR02	5	CLO-250	0							1	4	10
LT05-01	LT05	1	THI-2.5	1	M	1	1.3	28.863	49	46	16	9	6	15
LT05-02	LT05	1	THI-2.5	1	M	1	1.6	30.994	49	46	16	9	6	15
LT05-03	LT05	1	THI-2.5	1	M	1	1.5	31	49	46	16	9	6	15
LT05-04	LT05	1	THI-2.5	1	M	1	1.7	32.319	49	46	16	9	6	15
LT05-05	LT05	1	THI-2.5	1	F	0	1.7	31.399	49	46	16	9	6	15
LT05-06	LT05	1	THI-2.5	1	F	0	1.4	29.166	50	46	16	9	6	15
LT05-07	LT05	1	THI-2.5	1	F	0	1.8	30.837	50	46	16	9	6	15
LT05-08	LT05	1	THI-2.5	1	M	1	1.5	30.401	50	46	16	9	6	15
LT05-09	LT05	1	THI-2.5	1	F	0	1.8	29.727	53	46	16	9	6	15
LT05-10	LT05	1	THI-2.5	1	M	1	2.3	31.889	53	46	16	9	6	15
LT05-11	LT05	1	THI-2.5	1	F	0	2.3	34.004	53	46	16	9	6	15
LT05-12	LT05	1	THI-2.5	1	M	1	1.1	26.882	53	46	16	9	6	15
LT05-13	LT05	1	THI-2.5	1	M	1	1.7	31.504	53	46	16	9	6	15
LT05-14	LT05	1	THI-2.5	1	M	1	1.2	29.351	53	46	16	9	6	15
LT05-15	LT05	1	THI-2.5	1	F	0	2.3	34.251	56	46	16	9	6	15
LT05-16	LT05	1	THI-2.5	1			3.3			39	16	9	6
LT05-17	LT05	1	THI-2.5	0							4	9	6
LT05-18	LT05	1	THI-2.5	0							4	9	6
LT05-19	LT05	1	THI-2.5	0							4	9	6
LT05-20	LT05	1	THI-2.5	0							4	9	6
LT04-01	LT04	2	THI-2.5	1	F	0	1.1	25.047	53	46	19	3	13	16
LT04-02	LT04	2	THI-2.5	1	F	0	0.9	23.15	53	46	19	3	13	16
LT04-03	LT04	2	THI-2.5	1	F	0	0.6	19.846	53	46	19	3	13	16
LT04-04	LT04	2	THI-2.5	1	F	0	1.2	25.361	55	46	19	3	13	16
LT04-05	LT04	2	THI-2.5	1	F	0	0.9	24.953	56	46	19	3	13	16
LT04-06	LT04	2	THI-2.5	1	F	0	1.1	27.092	56	46	19	3	13	16
LT04-07	LT04	2	THI-2.5	1	F	0	1	26.157	56	46	19	3	13	16
LT04-08	LT04	2	THI-2.5	1	F	0	1	25.035	56	46	19	3	13	16
LT04-09	LT04	2	THI-2.5	1	F	0	0.9	25.901	57	46	19	3	13	16
LT04-10	LT04	2	THI-2.5	1	F	0	0.9	25.389	60	46	19	3	13	16
LT04-11	LT04	2	THI-2.5	1	M	1	0.6	22.502	60	46	19	3	13	16
LT04-12	LT04	2	THI-2.5	1	F	0	1.4	27.53	62	46	19	3	13	16
LT04-13	LT04	2	THI-2.5	1	F	0	1.2	28.532	62	46	19	3	13	16
LT04-14	LT04	2	THI-2.5	1	M	1	1	26.318	64	46	19	3	13	16
LT04-15	LT04	2	THI-2.5	1	F	0	1.1	28.191	64	46	19	3	13	16
LT04-16	LT04	2	THI-2.5	1	M	1	1.6	28.573	67	46	19	3	13	16
LT04-17	LT04	2	THI-2.5	1			5.7			41	19	3	13
LT04-18	LT04	2	THI-2.5	1			3.6			42	19	3	13
LT04-19	LT04	2	THI-2.5	1			5.5			41	19	3	13
LT04-20	LT04	2	THI-2.5	0							1	3	13
LT03-01	LT03	3	THI-2.5	1	F	0	1	25.402	50	46	16	6	9	15
LT03-02	LT03	3	THI-2.5	1	F	0	1.3	23.227	50	46	16	6	9	15
LT03-03	LT03	3	THI-2.5	1	M	1	1.1	26.658	53	46	16	6	9	15
LT03-04	LT03	3	THI-2.5	1	F	0	0.7	23.103	53	46	16	6	9	15
LT03-05	LT03	3	THI-2.5	1	F	0	0.6	19.945	53	46	16	6	9	15
LT03-06	LT03	3	THI-2.5	1	F	0	0.9	25.466	53	46	16	6	9	15
LT03-07	LT03	3	THI-2.5	1	M	1	0.9	23.594	53	46	16	6	9	15
LT03-08	LT03	3	THI-2.5	1	M	1	1	25.79	53	46	16	6	9	15
LT03-09	LT03	3	THI-2.5	1	F	0	1	25.928	55	46	16	6	9	15
LT03-10	LT03	3	THI-2.5	1	F	0	1.1	27.455	57	46	16	6	9	15
LT03-11	LT03	3	THI-2.5	1	M	1	1	24.787	60	46	16	6	9	15
LT03-12	LT03	3	THI-2.5	1	M	1	1.8	29.959	62	46	16	6	9	15
LT03-13	LT03	3	THI-2.5	1	F	0	2.5	33.07	67	46	16	6	9	15
LT03-14	LT03	3	THI-2.5	1	F	0	1.6	27.71	64	46	16	6	9	15
LT03-15	LT03	3	THI-2.5	1	M	1	2.3	32.07	67	46	16	6	9	15
LT03-16	LT03	3	THI-2.5	1			5.4			40	16	6	9
LT03-17	LT03	3	THI-2.5	0							4	6	9
LT03-18	LT03	3	THI-2.5	0							4	6	9
LT03-19	LT03	3	THI-2.5	0							4	6	9
LT03-20	LT03	3	THI-2.5	0							4	6	9
LT01-01	LT01	4	THI-2.5	1	F	0	0.9	25.367	53	46	16	3	7	10
LT01-02	LT01	4	THI-2.5	1	F	0	1.1	26.305	53	46	16	3	7	10
LT01-03	LT01	4	THI-2.5	1	F	0	1	25.455	53	46	16	3	7	10
LT01-04	LT01	4	THI-2.5	1	M	1	1.3	28.111	55	46	16	3	7	10
LT01-05	LT01	4	THI-2.5	1	F	0	0.8	22.64	55	46	16	3	7	10
LT01-06	LT01	4	THI-2.5	1			1.1	26.238	55	46	16	3	7	10
LT01-07	LT01	4	THI-2.5	1	F	0	1	26.627	56	46	16	3	7	10
LT01-08	LT01	4	THI-2.5	1	M	1	1.3	27.688	60	46	16	3	7	10
LT01-09	LT01	4	THI-2.5	1	F	0	1.8	27.815	64	46	16	3	7	10
LT01-10	LT01	4	THI-2.5	1	M	1	0.8	22.919	64	46	16	3	7	10
LT01-11	LT01	4	THI-2.5	1	F	0	1.7	26.555	67	46	16	3	7	10
LT01-12	LT01	4	THI-2.5	1			4.3			40	16	3	7
LT01-13	LT01	4	THI-2.5	1			4.7			40	16	3	7
LT01-14	LT01	4	THI-2.5	1			1.9			43	16	3	7
LT01-15	LT01	4	THI-2.5	1			5.3			40	16	3	7
LT01-16	LT01	4	THI-2.5	1			3.1			43	16	3	7
LT01-17	LT01	4	THI-2.5	0							4	3	7
LT01-18	LT01	4	THI-2.5	0							4	3	7
LT01-19	LT01	4	THI-2.5	0							4	3	7
LT01-20	LT01	4	THI-2.5	0							4	3	7
LT02-01	LT02	5	THI-2.5	1	F	0	0.7	24.4	55	46	16	1	7	8
LT02-02	LT02	5	THI-2.5	1	F	0	1.2	28.255	55	46	16	1	7	8
LT02-03	LT02	5	THI-2.5	1	F	0	0.6	22.612	56	46	16	1	7	8
LT02-04	LT02	5	THI-2.5	1	F	0	0.6	22.868	56	46	16	1	7	8
LT02-05	LT02	5	THI-2.5	1	F	0	1	25.751	60	46	16	1	7	8
LT02-06	LT02	5	THI-2.5	1	F	0	0.8	24.309	62	46	16	1	7	8
LT02-07	LT02	5	THI-2.5	1	M	1	1.1	24.112	64	46	16	1	7	8
LT02-08	LT02	5	THI-2.5	1	F	0	0.7	22.241	67	46	16	1	7	8
LT02-09	LT02	5	THI-2.5	1			1.4			43	16	1	7
LT02-10	LT02	5	THI-2.5	1			3.8			39	16	1	7
LT02-11	LT02	5	THI-2.5	1			1.8			32	16	1	7
LT02-12	LT02	5	THI-2.5	1			3.1			39	16	1	7
LT02-13	LT02	5	THI-2.5	1			3			36	16	1	7
LT02-14	LT02	5	THI-2.5	1			1.9			42	16	1	7
LT02-15	LT02	5	THI-2.5	1			2.8			40	16	1	7
LT02-16	LT02	5	THI-2.5	1			4.6			40	16	1	7
LT02-17	LT02	5	THI-2.5	0							4	1	7
LT02-18	LT02	5	THI-2.5	0							4	1	7
LT02-19	LT02	5	THI-2.5	0							4	1	7
LT02-20	LT02	5	THI-2.5	0							4	1	7
LY02-01	LY02	1	THI-250	1	F	0	1.2	26.587	49	46	17	5	10	15
LY02-02	LY02	1	THI-250	1	F	0	1.1	26.274	50	46	17	5	10	15
LY02-03	LY02	1	THI-250	1	F	0	0.9	24.739	50	46	17	5	10	15
LY02-04	LY02	1	THI-250	1	F	0	1	23.895	50	46	17	5	10	15
LY02-05	LY02	1	THI-250	1	F	0	1.2	26.492	50	46	17	5	10	15
LY02-06	LY02	1	THI-250	1	M	1	1.2	29.144	54	46	17	5	10	15
LY02-07	LY02	1	THI-250	1	F	0	1.3	28.873	54	46	17	5	10	15
LY02-08	LY02	1	THI-250	1	F	0	1.3	27.018	54	46	17	5	10	15
LY02-09	LY02	1	THI-250	1	M	1	1.4	29.082	54	46	17	5	10	15
LY02-10	LY02	1	THI-250	1	M	1	1	25.3254	54	46	17	5	10	15
LY02-11	LY02	1	THI-250	1	F	0	1.5	29.141	55	46	17	5	10	15
LY02-12	LY02	1	THI-250	1			1.1	27.241	55	46	17	5	10	15
LY02-13	LY02	1	THI-250	1	M	1	0.9	24.498	56	46	17	5	10	15
LY02-14	LY02	1	THI-250	1	F	0	1.9	31.536	56	46	17	5	10	15
LY02-15	LY02	1	THI-250	1	M	1	1.7	28.552	60	46	17	5	10	15
LY02-16	LY02	1	THI-250	1	F	0	1.8	31.668	62	46	17	5	10	15
LY02-17	LY02	1	THI-250	1			7.5			41	17	5	10
LY02-18	LY02	1	THI-250	0							3	5	10
LY02-19	LY02	1	THI-250	0							3	5	10
LY02-20	LY02	1	THI-250	0							3	5	10
LY01-01	LY01	2	THI-250	1	M	1	0.6	21.562	54	46	19	6	7	13
LY01-02	LY01	2	THI-250	1	F	0	0.7	23.36	54	46	19	6	7	13
LY01-03	LY01	2	THI-250	1	M	1	0.8	23.312	54	46	19	6	7	13
LY01-04	LY01	2	THI-250	1	M	1	0.9	26.025	54	46	19	6	7	13
LY01-05	LY01	2	THI-250	1	M	1	0.8	25.451	55	46	19	6	7	13
LY01-06	LY01	2	THI-250	1	F	0	0.8	24.544	56	46	19	6	7	13
LY01-07	LY01	2	THI-250	1	F	0	1.1	27.27	57	46	19	6	7	13
LY01-08	LY01	2	THI-250	1	F	0	1.8	29.557	60	46	19	6	7	13
LY01-09	LY01	2	THI-250	1	F	0	1.1	25.227	62	46	19	6	7	13
LY01-10	LY01	2	THI-250	1	M	1	1.3	28.514	62	46	19	6	7	13
LY01-11	LY01	2	THI-250	1	M	1	1.5	29.981	64	46	19	6	7	13
LY01-12	LY01	2	THI-250	1	F	0	1.6	29.205	67	46	19	6	7	13
LY01-13	LY01	2	THI-250	1	F	0	1.2	29.502	67	46	19	6	7	13
LY01-14	LY01	2	THI-250	1			1.5			44	19	6	7
LY01-15	LY01	2	THI-250	1			1.3			31	19	6	7
LY01-16	LY01	2	THI-250	1			2.4			39	19	6	7
LY01-17	LY01	2	THI-250	1			1.2			26	19	6	7
LY01-18	LY01	2	THI-250	1			3.8			41	19	6	7
LY01-19	LY01	2	THI-250	1			3			40	19	6	7
LY01-20	LY01	2	THI-250	0							1	6	7
LY03-01	LY03	3	THI-250	1	M	1	1.3	25.884	54	46	17	6	9	15
LY03-02	LY03	3	THI-250	1	F	0	1.4	28.754	54	46	17	6	9	15
LY03-03	LY03	3	THI-250	1	F	0	1.4	27.794	54	46	17	6	9	15
LY03-04	LY03	3	THI-250	1	F	0	1	26.115	54	46	17	6	9	15
LY03-05	LY03	3	THI-250	1	F	0	1.7	30.057	55	46	17	6	9	15
LY03-06	LY03	3	THI-250	1	F	0	1.2	27.361	56	46	17	6	9	15
LY03-07	LY03	3	THI-250	1	F	0	0.8	24.034	56	46	17	6	9	15
LY03-08	LY03	3	THI-250	1	M	1	1.5	31.474	57	46	17	6	9	15
LY03-09	LY03	3	THI-250	1	F	0	1.5	31.141	57	46	17	6	9	15
LY03-10	LY03	3	THI-250	1	F	0	1.1	28.954	60	46	17	6	9	15
LY03-11	LY03	3	THI-250	1	M	1	1.4	29.892	60	46	17	6	9	15
LY03-12	LY03	3	THI-250	1	M	1	1.4	31.194	60	46	17	6	9	15
LY03-13	LY03	3	THI-250	1	M	1	1.8	29.535	62	46	17	6	9	15
LY03-14	LY03	3	THI-250	1	F	0	1.5	28.026	62	46	17	6	9	15
LY03-15	LY03	3	THI-250	1	M	1	3	35.639	67	46	17	6	9	15
LY03-16	LY03	3	THI-250	1			8			41	17	6	9
LY03-17	LY03	3	THI-250	1			4.9			40	17	6	9
LY03-18	LY03	3	THI-250	0							3	6	9
LY03-19	LY03	3	THI-250	0							3	6	9
LY03-20	LY03	3	THI-250	0							3	6	9
LY04-01	LY04	4	THI-250	1	M	1	1.1	24.813	54	46	19	5	8	13
LY04-02	LY04	4	THI-250	1	F	0	1	24.683	54	46	19	5	8	13
LY04-03	LY04	4	THI-250	1	F	0	1.1	25.772	54	46	19	5	8	13
LY04-04	LY04	4	THI-250	1	F	0	0.9	22.873	54	46	19	5	8	13
LY04-05	LY04	4	THI-250	1	F	0	1	25.483	55	46	19	5	8	13
LY04-06	LY04	4	THI-250	1	M	1	0.7	23.627	55	46	19	5	8	13
LY04-07	LY04	4	THI-250	1	F	0	1.3	28.917	56	46	19	5	8	13
LY04-08	LY04	4	THI-250	1	M	1	1.2	26.921	56	46	19	5	8	13
LY04-09	LY04	4	THI-250	1	F	0	1.1	26.41	56	46	19	5	8	13
LY04-10	LY04	4	THI-250	1	M	1	0.8	24.949	56	46	19	5	8	13
LY04-11	LY04	4	THI-250	1	F	0	1	26.896	60	46	19	5	8	13
LY04-12	LY04	4	THI-250	1	M	1	1.2	28.18	62	46	19	5	8	13
LY04-13	LY04	4	THI-250	1	F	0	1.4	28.179	67	46	19	5	8	13
LY04-14	LY04	4	THI-250	1			2.5			44	19	5	8
LY04-15	LY04	4	THI-250	1			2.1			44	19	5	8
LY04-16	LY04	4	THI-250	1			1.3			45	19	5	8
LY04-17	LY04	4	THI-250	1			5.6			41	19	5	8
LY04-18	LY04	4	THI-250	1			5.7			41	19	5	8
LY04-19	LY04	4	THI-250	1			1.4			27	19	5	8
LY04-20	LY04	4	THI-250	0							1	5	8
LY05-01	LY05	5	THI-250	1	F	0	1.4	27.429	54	46	19	6	11	17
LY05-02	LY05	5	THI-250	1	M	1	1.1	26.382	54	46	19	6	11	17
LY05-03	LY05	5	THI-250	1	F	0	0.8	24.243	54	46	19	6	11	17
LY05-04	LY05	5	THI-250	1	F	0	1	26.159	54	46	19	6	11	17
LY05-05	LY05	5	THI-250	1	F	0	1.1	27.546	50	46	19	6	11	17
LY05-06	LY05	5	THI-250	1	F	0	0.6	23.225	55	46	19	6	11	17
LY05-07	LY05	5	THI-250	1	M	1	1.2	27.664	55	46	19	6	11	17
LY05-08	LY05	5	THI-250	1	F	0	1.3	28.898	55	46	19	6	11	17
LY05-09	LY05	5	THI-250	1	F	0	0.8	25.175	56	46	19	6	11	17
LY05-10	LY05	5	THI-250	1	F	0	1.1	26.687	56	46	19	6	11	17
LY05-11	LY05	5	THI-250	1	M	1	1.4	28.219	56	46	19	6	11	17
LY05-12	LY05	5	THI-250	1	M	1	1.4	29.716	56	46	19	6	11	17
LY05-13	LY05	5	THI-250	1	M	1	0.9	23.83	56	46	19	6	11	17
LY05-14	LY05	5	THI-250	1	F	0	2	33.004	60	46	19	6	11	17
LY05-15	LY05	5	THI-250	1	F	0	0.7	23.158	60	46	19	6	11	17
LY05-16	LY05	5	THI-250	1	M	1	1	26.948	62	46	19	6	11	17
LY05-17	LY05	5	THI-250	1	F	0	1.5	29.348	64	46	19	6	11	17
LY05-18	LY05	5	THI-250	1			2.4			45	19	6	11
LY05-19	LY05	5	THI-250	1			4.9			40	19	6	11
LY05-20	LY05	5	THI-250	0							1	6	11

## Sheet: WFRepeats
FrogID	Body Length
G02-M12	23.232
G02-M12	23.34
G02-M12	23.459
G02-M12	23.202
G02-M12	23.393
G02-M12	23.137
G02-M12	23.196
G02-M12	23.284
G02-M12	23.355
G02-M12	23.313
G02-M12	23.312
G02-M12	23.324
G02-M12	23.322
G02-M12	23.36
G02-M12	23.418
G02-M12	23.366
G02-M12	23.311
G02-M12	23.219
G02-M12	23.028
G02-M12	23.43
G03-M06	20.986
G03-M06	21.875
G03-M06	21.77
G03-M06	21.758
G03-M06	21.89
G03-M06	21.943
G03-M06	21.736
G03-M06	21.711
G03-M06	21.927
G03-M06	21.835
G03-M06	22.019
G03-M06	21.97
G03-M06	21.97
G03-M06	21.704
G03-M06	21.645
G03-M06	21.672
G03-M06	21.804
G03-M06	21.976
G03-M06	21.928
G03-M06	21.873
P04-M07	18.248
P04-M07	18.397
P04-M07	18.412
P04-M07	18.558
P04-M07	18.307
P04-M07	18.334
P04-M07	18.497
P04-M07	18.344
P04-M07	18.372
P04-M07	18.464
P04-M07	15.581
P04-M07	18.452
P04-M07	18.504
P04-M07	18.41
P04-M07	18.334
P04-M07	18.496
P04-M07	18.521
P04-M07	18.452
P04-M07	18.427
P04-M07	18.359

## Sheet: LFRepeats
FrogID	Body Length
LG03-M10	24.661
LG03-M10	24.462
LG03-M10	24.478
LG03-M10	24.847
LG03-M10	24.577
LG03-M10	24.66
LG03-M10	24.694
LG03-M10	24.593
LG03-M10	24.852
LG03-M10	24.958
LG03-M10	24.391
LG03-M10	24.813
LG03-M10	24.847
LP04-M04	24.966
LP04-M04	24.586
LP04-M04	24.552
LP04-M04	24.932
LP04-M04	24.932
LP04-M04	25.358
LP04-M04	25.067
LP04-M04	25
LP04-M04	24.793
LP04-M04	25.021
LP04-M04	25.056
LP04-M04	25.19
LP04-M04	25.285
LR02-M13	30.235
LR02-M13	30.144
LR02-M13	30.2
LR02-M13	30.279
LR02-M13	29.843
LR02-M13	30.302
LR02-M13	30.2
LR02-M13	30.123
LR02-M13	30.067
LR02-M13	30.182
LR02-M13	29.933
LR02-M13	29.801
LR02-M13	30.376
